# Supplementary material for: Understanding the immune system architecture and transcriptome responses to southern rice black-streaked dwarf virus in Sogatella furcifera
Source: PubMed Central journal article supplement (PMC5090245; doi:10.1038/srep36254), 2016-11-02
Supplement: srep36254-s1.pdf [file srep36254-s1.pdf]

# Understanding the immune system architecture and transcriptome responses to southern rice black-streaked dwarf virus in *Sogatella furcifera*

Lin Wang<sup>1,\*</sup>, Nan Tang<sup>1,\*</sup>, Xinlei Gao<sup>1</sup>, Dongyang Guo<sup>1</sup>, Zhaoxia Chang<sup>1</sup>, Yating Fu<sup>1</sup>, Ibukun A. Akinyemi<sup>1</sup>, Qingfa Wu<sup>1,2,&</sup>

1. School of Life Sciences, University of Science and Technology of China, Hefei, Anhui 230027, China
2. Hefei National Laboratory for Physical Sciences at the Microscale, Bio-X Interdisciplinary Sciences, 443 Huang-Shan Road, Hefei, Anhui 230027, China

\*Co-first author

& Correspondence: [wuqf@ustc.edu.cn](mailto:wuqf@ustc.edu.cn)

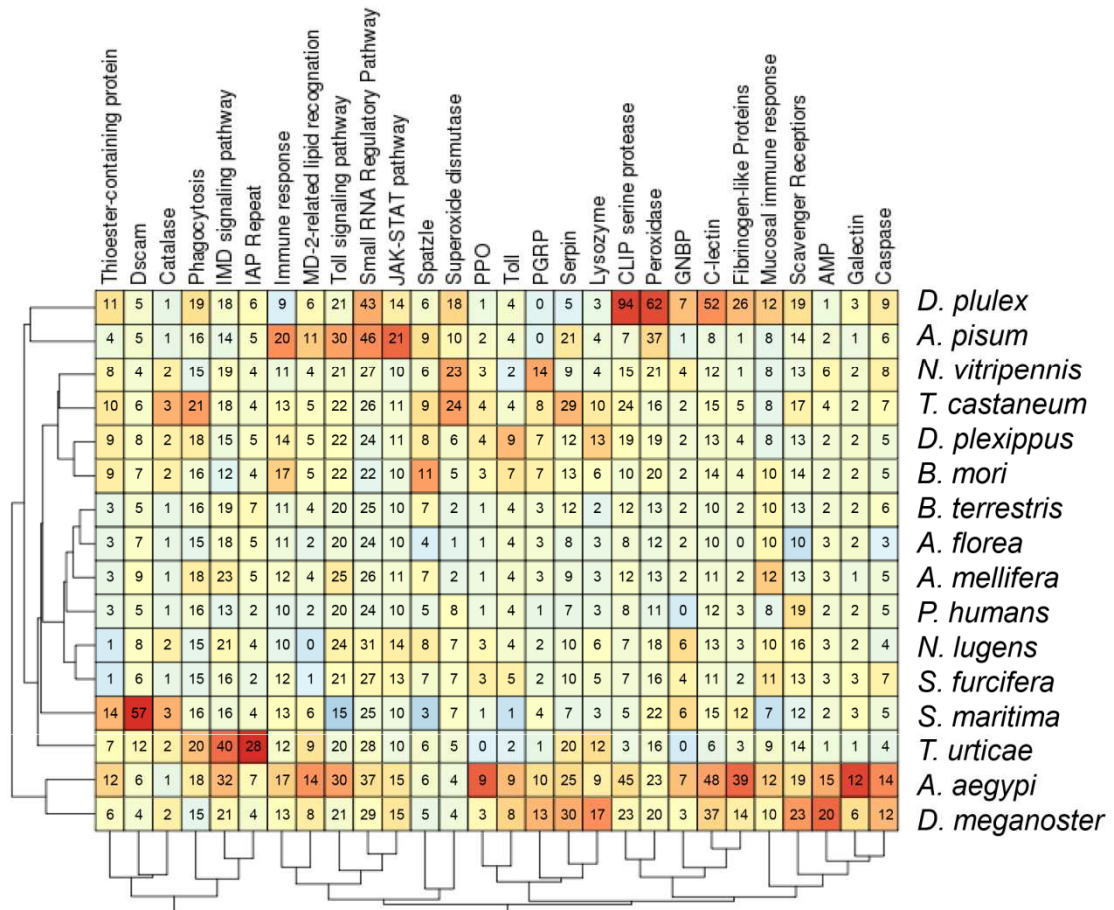

**Figure S1. Heatmap of immune genes belonging to 28 families among 16 insects and arthropod.** The clustering analysis was performed using Euclidean distances based on the number of genes within these families.

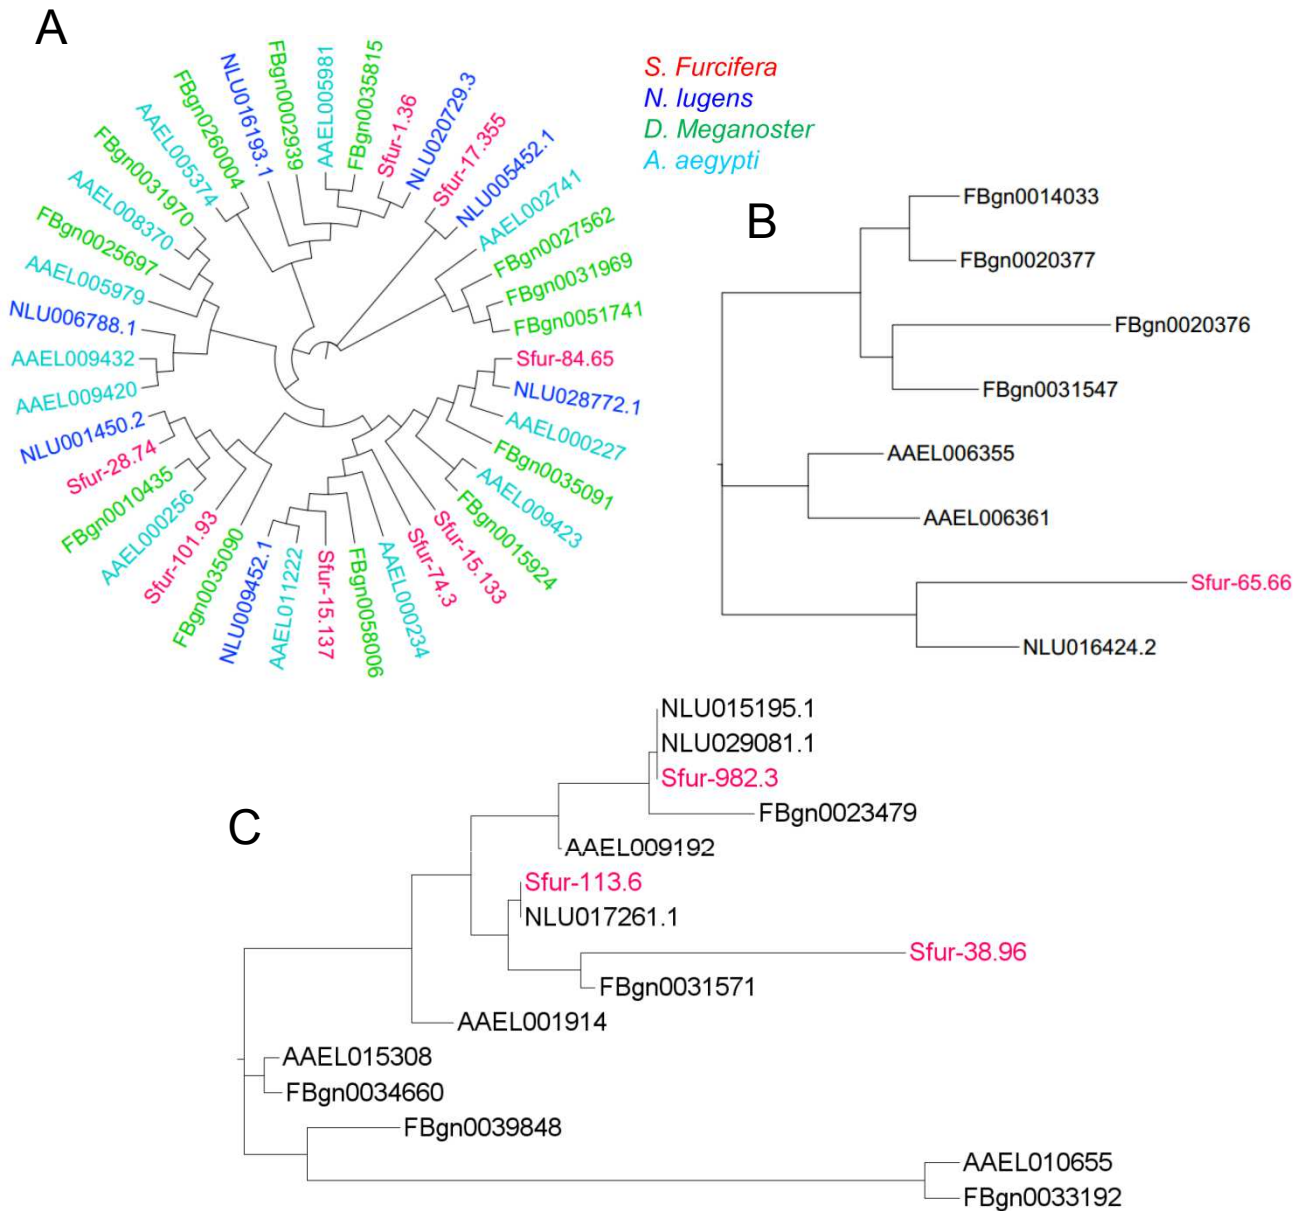

**Figure S2. Phylogenetic analysis of scavenger receptors based on the sequences from four insects *S. furcifera*, *N. lugens*, *D. Melanogaster* and *A. aegypti*.** (A). Phylogenetic analysis of SCR B. (B). Phylogenetic analysis of SCR C. (C). Phylogenetic analysis of SCR A.

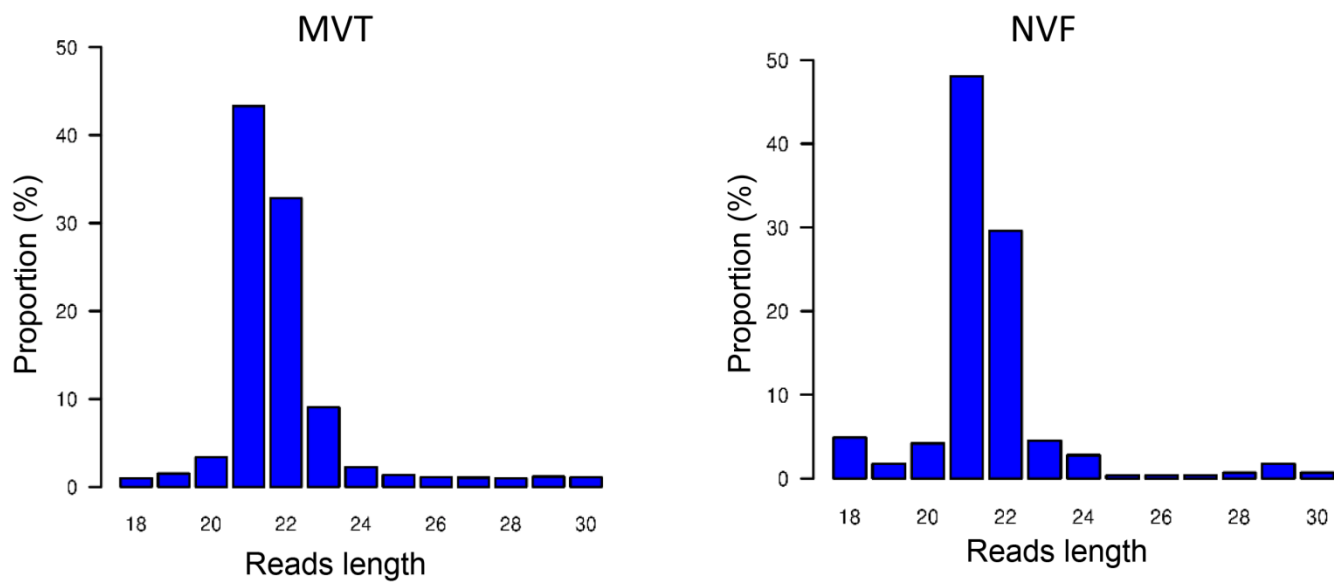

**Figure S3. Length distribution of viral small RNAs in MVT and NVF libraries.** These reads were mapped on SRBSDV genome with 0-1 mismatch.

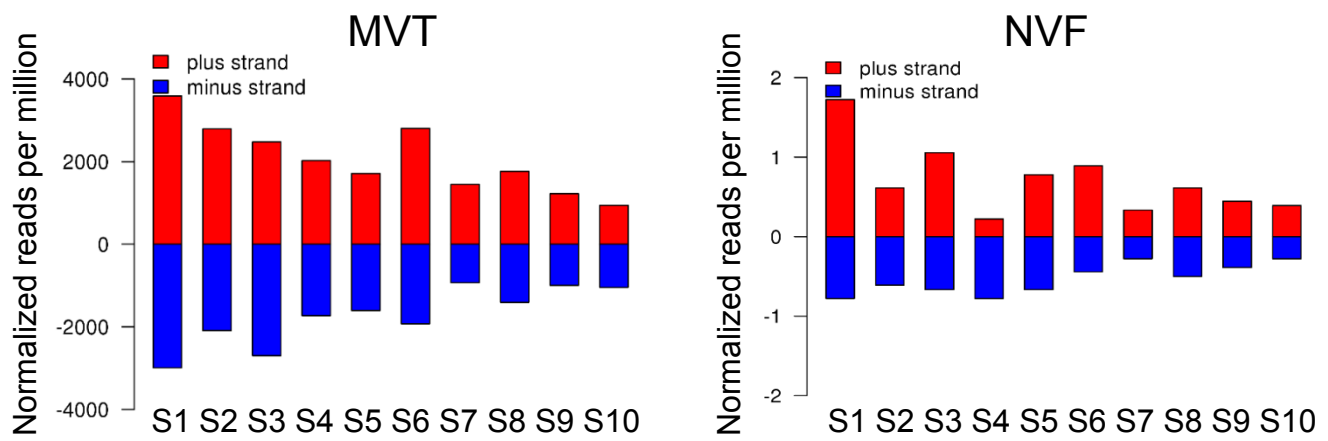

**Figure S4. Distribution of viral small RNAs across SRBSDV segments.** These reads were mapped on SRBSDV genome with 0-1 mismatch. Red bars represent reads mapping to the plus strand of the genome, blue bars depict reads from the minus strand.

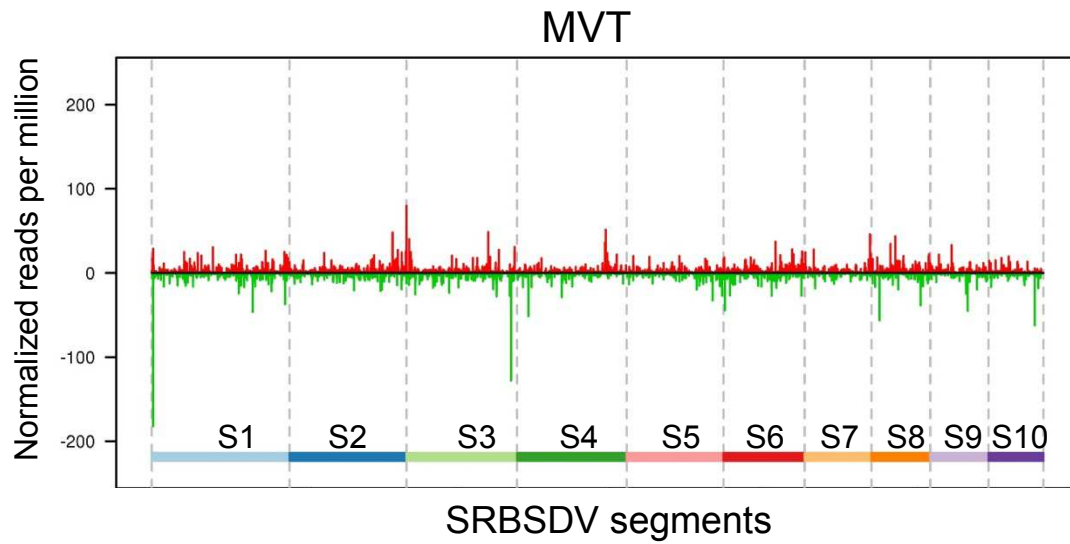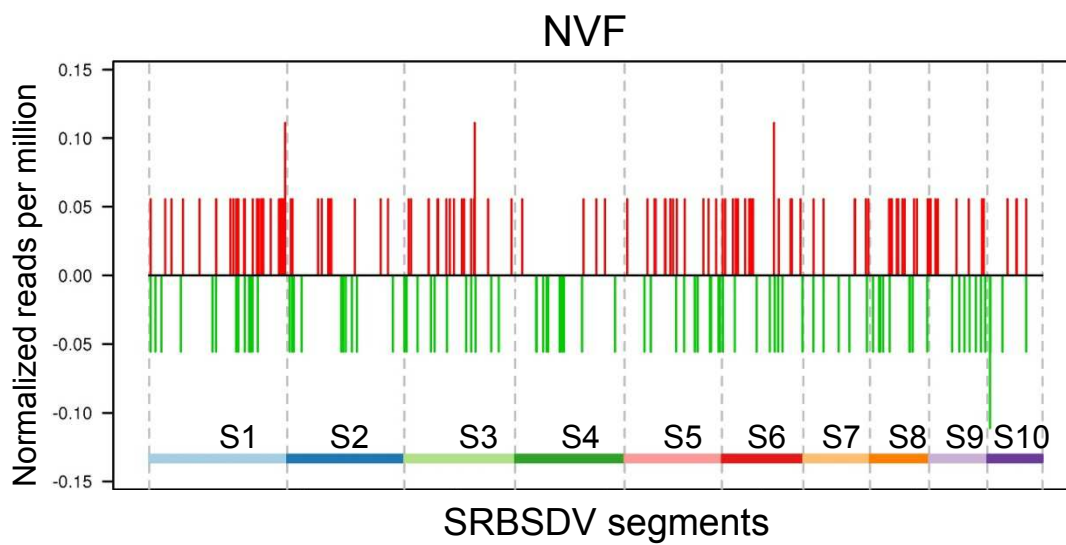

**Figure S5. Distribution of 21-22 nt viral siRNAs across the SRBSDV segments.** X-axis represents nucleotide positions of each SRBSDV segment. Y-axis represents the abundance of viral siRNAs derived from plus strand (in red) and minus strand (in green).

**Table S1. The length and genomic location of *S. furcifera* immune-related genes**

| Gene families          | Gene name   | <i>S. furcifera</i> | Length (aa)                   | Position                        |
|------------------------|-------------|---------------------|-------------------------------|---------------------------------|
| RNA interference       | AGO2        | Sfur-72.600         | 1428                          | Scaffold-72:12085052:12144874:- |
|                        | Dcr-2       | Sfur-139.28         | 2186                          | Scaffold-139:532985:590929:-    |
|                        | r2d2        | Sfur-20.248         | 514                           | Scaffold-20:6308822:6317874:+   |
|                        | loqs        | Sfur-50.248         | 767                           | Scaffold-50:2980448:3005829:-   |
|                        | Hen1        | Sfur-230.43         | 580                           | Scaffold-230:703662:716214:-    |
|                        | drosha      | Sfur-223.33         | 1470                          | Scaffold-223:591595:600005:-    |
|                        | pasha       | Sfur-504.10         | 825                           | Scaffold-504:189208:193788:+    |
|                        | dicer-1     | Sfur-151.9          | 2408                          | Scaffold-151:111942:156291:+    |
|                        | AGO1        | Sfur-63.27          | 941                           | Scaffold-63:496214:532159:+     |
|                        | AGO3        | Sfur-63.71          | 638                           | Scaffold-63:1412610:1447497:-   |
|                        | translin    | Sfur-450.9          | 217                           | Scaffold-450:123901:125043:+    |
|                        |             | Sfur-148.30         | 244                           | Scaffold-148:444188:455617:-    |
|                        | Fmr1        | Sfur-172.36         | 699                           | Scaffold-172:749316:779876:-    |
|                        | armitage    | Sfur-326.2          | 1529                          | Scaffold-326:28748:68080:+      |
|                        | spn-E       | Sfur-513.9          | 1348                          | Scaffold-513:207469:263986:-    |
|                        | CRIF        | Sfur-6.74           | 255                           | Scaffold-6:1300928:1301945:+    |
|                        | CG17265     | Sfur-542.11         | 449                           | Scaffold-542:230231:236575:+    |
|                        |             | Sfur-641.4          | 446                           | Scaffold-641:134980:141634:-    |
|                        | Cbp80       | Sfur-19.148         | 802                           | Scaffold-19:3422899:3478056:+   |
|                        | Elp1        | Sfur-72.23          | 2210                          | Scaffold-72:270020:304665:+     |
|                        | Tis11       | Sfur-267.17         | 304                           | Scaffold-267:322278:374007:-    |
|                        | Ars2        | Sfur-17.78          | 871                           | Scaffold-17:1515324:1554169:+   |
|                        | aubergine   | Sfur-22.29          | 949                           | Scaffold-22:864160:889166:-     |
|                        | pcm         | Sfur-503.9          | 1518                          | Scaffold-503:156893:202935:-    |
| bel                    | Sfur-72.131 | 1114                | Scaffold-72:2169965:2212675:- |                                 |
| hdc                    | Sfur-17.133 | 226                 | Scaffold-17:2809090:2809767:- |                                 |
|                        | Sfur-17.131 | 360                 | Scaffold-17:2720970:2787399:- |                                 |
| Toll signaling pathway | cact        | Sfur-184.26         | 636                           | Scaffold-184:477522:494628:+    |
|                        | Myd88       | Sfur-169.16         | 189                           | Scaffold-169:446528:450576:+    |
|                        | Pelle       | Sfur-95.27          | 1992                          | Scaffold-95:430748:481309:-     |
|                        | spz         | Sfur-54.115         | 566                           | Scaffold-54:2058372:2079173:+   |
|                        | spz3        | Sfur-24.293         | 390                           | Scaffold-24:7169425:7216883:+   |
|                        | spz4        | Sfur-33.150         | 507                           | Scaffold-33:2533097:2541457:-   |
|                        | spz5        | Sfur-261.1          | 1830                          | Scaffold-261:1218:105685:+      |
|                        | spz6        | Sfur-5.212          | 507                           | Scaffold-5:4596404:4604268:-    |
|                        | Tl          | Sfur-33.32          | 1079                          | Scaffold-33:381269:392154:+     |
|                        | Dorsal      | Sfur-213.33         | 1324                          | Scaffold-213:416851:449531:+    |
|                        | dif         | Sfur-152.4          | 707                           | Scaffold-152:37993:59581:-      |
|                        | tollip      | Sfur-1.116          | 283                           | Scaffold-1:2070877:2077910:-    |

|                               |                |              |                               |                                |
|-------------------------------|----------------|--------------|-------------------------------|--------------------------------|
|                               | tube           | Sfur-23.126  | 502                           | Scaffold-23:2433405:2457027:+  |
|                               | Hel89B         | Sfur-72.337  | 1825                          | Scaffold-72:6253603:6295642:-  |
|                               | Pli            | Sfur-141.21  | 405                           | Scaffold-141:391115:409284:-   |
|                               | Ulp1           | Sfur-374.8   | 217                           | Scaffold-374:99750:105290:-    |
|                               | mop            | Sfur-120.31  | 2042                          | Scaffold-120:719241:769863:-   |
|                               |                | Sfur-222.1   | 263                           | Scaffold-222:635:5899:-        |
|                               | puf            | Sfur-76.16   | 3399                          | Scaffold-76:399715:465615:-    |
|                               | krz            | Sfur-223.13  | 812                           | Scaffold-223:136074:213053:-   |
|                               | Gprk2          | Sfur-20.8    | 658                           | Scaffold-20:91299:110624:-     |
| IMD signaling pathway         | caspar         | Sfur-17.324  | 640                           | Scaffold-17:7041532:7068673:-  |
|                               |                | Sfur-150.27  | 909                           | Scaffold-150:508354:534321:+   |
|                               | Diap1          | Sfur-529.12  | 592                           | Scaffold-529:214043:230293:+   |
|                               | IKKgamma(ke y) | Sfur-13.59   | 736                           | Scaffold-13:810071:814236:-    |
|                               | IKKepsilon     | Sfur-410.14  | 1705                          | Scaffold-410:302488:373452:+   |
|                               | imd            | Sfur-17.218  | 250                           | Scaffold-17:4620946:4627921:+  |
|                               | Rel            | Sfur-1444.20 | 2434                          | Scaffold-1444:377656:459802:+  |
|                               | Tab2           | Sfur-186.23  | 374                           | Scaffold-186:376453:386186:+   |
|                               | Tak1           | Sfur-9.184   | 459                           | Scaffold-9:3264533:3282901:+   |
|                               | Dredd          | Sfur-460.16  | 658                           | Scaffold-460:288818:301975:+   |
|                               | Traf-like      | Sfur-17.342  | 510                           | Scaffold-17:7444785:7448848:+  |
|                               | Traf4          | Sfur-66.92   | 454                           | Scaffold-66:1752324:1781555:+  |
|                               | Ubc13          | Sfur-251.194 | 152                           | Scaffold-251:2376907:2378585:+ |
|                               | TM9SF2         | Sfur-184.28  | 635                           | Scaffold-184:528926:545514:-   |
| Sfur-396.5                    |                | 662          | Scaffold-396:95424:112169:+   |                                |
| TM9SF4                        | Sfur-70.81     | 628          | Scaffold-70:1939943:1955965:- |                                |
| JAK-STAT cascade              | dome           | Sfur-27.95   | 1146                          | Scaffold-27:2056152:2110712:+  |
|                               | hop            | Sfur-24.235  | 1149                          | Scaffold-24:6194992:6212334:+  |
|                               | Stat92E        | Sfur-86.26   | 819                           | Scaffold-86:538648:574609:+    |
|                               | Su(var)2-10    | Sfur-38.48   | 1346                          | Scaffold-38:631139:683688:-    |
|                               | Socs36E        | Sfur-101.37  | 742                           | Scaffold-101:433811:453034:+   |
|                               |                | Sfur-28.3    | 634                           | Scaffold-28:27728:38467:+      |
|                               |                | Sfur-315.10  | 498                           | Scaffold-315:303506:305470:+   |
|                               | Socs16D        | Sfur-289.13  | 536                           | Scaffold-289:259475:275878:-   |
|                               | Socs44A        | Sfur-64.68   | 405                           | Scaffold-64:1846456:1847958:-  |
|                               | E(bx)          | Sfur-40.46   | 2809                          | Scaffold-40:840470:903746:-    |
|                               | kn             | Sfur-114.36  | 555                           | Scaffold-114:584316:693007:+   |
|                               | asrij          | Sfur-51.78   | 467                           | Scaffold-51:1847845:1856507:-  |
| mask                          | Sfur-161.6     | 2812         | Scaffold-161:199510:268864:-  |                                |
| melanization defense response | PPO            | Sfur-106.2   | 1519                          | Scaffold-106:22332:80613:+     |
|                               |                | Sfur-283.14  | 674                           | Scaffold-283:250627:263761:-   |
|                               |                | Sfur-62.181  | 693                           | Scaffold-62:2689850:2708591:+  |
|                               | serpin         | Sfur-204.21  | 396                           | Scaffold-204:469759:487164:-   |



|                              |                             |             |                               |                                |
|------------------------------|-----------------------------|-------------|-------------------------------|--------------------------------|
|                              |                             | Sfur-335.4  | 1580                          | Scaffold-335:52395:70236:+     |
|                              |                             | Sfur-350.3  | 541                           | Scaffold-350:94048:100689:-    |
|                              |                             | Sfur-377.2  | 1130                          | Scaffold-377:20825:57190:-     |
|                              |                             | Sfur-45.55  | 422                           | Scaffold-45:1207498:1233798:+  |
|                              |                             | Sfur-470.6  | 902                           | Scaffold-470:94763:113675:-    |
|                              |                             | Sfur-2570.1 | 144                           | Scaffold-2570:521:9244:+       |
|                              |                             | Sfur-71.69  | 839                           | Scaffold-71:1251056:1271974:-  |
|                              |                             | Sfur-88.14  | 599                           | Scaffold-88:238566:256328:-    |
|                              |                             | Sfur-97.15  | 283                           | Scaffold-97:281314:286609:+    |
|                              | CLIP-domain serine protease | Sfur-364.6  | 725                           | Scaffold-364:117445:141627:-   |
|                              |                             | Sfur-389.3  | 674                           | Scaffold-389:31857:88292:-     |
|                              |                             | Sfur-745.2  | 773                           | Scaffold-745:67730:84072:+     |
|                              |                             | Sfur-49.2   | 1600                          | Scaffold-49:86919:138347:+     |
|                              |                             | Sfur-234.17 | 393                           | Scaffold-234:414952:424743:-   |
|                              |                             | Sfur-54.75  | 569                           | Scaffold-54:1485881:1504889:+  |
|                              |                             | Sfur-9.240  | 542                           | Scaffold-9:4261579:4288294:-   |
|                              | bsk                         | Sfur-95.52  | 722                           | Scaffold-95:940615:1011164:-   |
|                              | egr                         | Sfur-88.72  | 381                           | Scaffold-88:1406853:1451622:+  |
|                              | hep                         | Sfur-105.58 | 1468                          | Scaffold-105:1080031:1152391:+ |
|                              | Rho1                        | Sfur-15.272 | 193                           | Scaffold-15:6382420:6398542:-  |
| Sfur-39.58                   |                             | 198         | Scaffold-39:1396821:1400937:+ |                                |
| pattern recognition receptor | C-lectin                    | Sfur-115.19 | 1399                          | Scaffold-115:395000:437892:+   |
|                              |                             | Sfur-1233.4 | 87                            | Scaffold-1233:24696:25315:-    |
|                              |                             | Sfur-135.14 | 284                           | Scaffold-135:155503:164681:-   |
|                              |                             | Sfur-7.132  | 1220                          | Scaffold-7:3368036:3409056:+   |
|                              |                             | Sfur-1591.2 | 377                           | Scaffold-1591:14026:22754:-    |
|                              |                             | Sfur-20.43  | 210                           | Scaffold-20:1250883:1255841:+  |
|                              |                             | Sfur-276.9  | 226                           | Scaffold-276:206934:228516:+   |
|                              |                             | Sfur-925.2  | 207                           | Scaffold-925:54977:59363:+     |
|                              |                             | Sfur-635.1  | 1222                          | Scaffold-635:130696:171774:+   |
|                              |                             | Sfur-308.14 | 2533                          | Scaffold-308:357433:462847:-   |
|                              |                             | Sfur-438.7  | 774                           | Scaffold-438:180639:295948:-   |
|                              |                             | GNBP        | Sfur-168.43                   | 1729                           |
|                              | Sfur-449.5                  |             | 2161                          | Scaffold-449:123216:177396:+   |
|                              | Sfur-186.24                 |             | 542                           | Scaffold-186:388922:408037:+   |
|                              | Sfur-71.64                  |             | 1205                          | Scaffold-71:1083269:1138287:+  |
|                              | PGRP-LC                     | Sfur-122.48 | 1364                          | Scaffold-122:1078566:1117556:+ |
|                              | PGRP-LB                     | Sfur-20.196 | 499                           | Scaffold-20:5382138:5388174:-  |
|                              | Draper                      | Sfur-78.16  | 944                           | Scaffold-78:344988:407245:-    |
|                              | dscam                       | Sfur-115.24 | 14063                         | Scaffold-115:540151:720943:-   |
|                              |                             | Sfur-160.34 | 1636                          | Scaffold-160:643330:739246:+   |
|                              |                             | Sfur-17.263 | 2171                          | Scaffold-17:5671259:5736018:-  |
|                              |                             | Sfur-205.33 | 3270                          | Scaffold-205:546848:690961:+   |

|                                |             |              |                               |                                |
|--------------------------------|-------------|--------------|-------------------------------|--------------------------------|
|                                |             | Sfur-413.23  | 1301                          | Scaffold-413:376783:437386:+   |
|                                |             | Sfur-79.65   | 1860                          | Scaffold-79:1228387:1280718:+  |
|                                | Eater       | Sfur-13.168  | 1618                          | Scaffold-13:2870923:2897529:+  |
|                                | galectin    | Sfur-133.5   | 1153                          | Scaffold-133:124471:166675:-   |
|                                |             | Sfur-169.42  | 2011                          | Scaffold-169:789485:872547:-   |
|                                |             | Sfur-9.77    | 1312                          | Scaffold-9:1295870:1322459:+   |
|                                | hemocytin   | Sfur-199.20  | 4409                          | Scaffold-199:448045:536423:-   |
|                                |             | Sfur-769.5   | 3557                          | Scaffold-769:81176:118211:+    |
| defense response to virus      | Atg18a      | Sfur-78.63   | 455                           | Scaffold-78:1262805:1294285:+  |
|                                | Atg7        | Sfur-146.38  | 366                           | Scaffold-146:731158:735420:+   |
|                                |             | Sfur-602.5   | 593                           | Scaffold-602:68037:77373:+     |
|                                | CG10333     | Sfur-347.22  | 653                           | Scaffold-347:400887:410359:-   |
|                                | me31B       | Sfur-169.35  | 449                           | Scaffold-169:687218:700687:+   |
|                                | Mt2         | Sfur-3.151   | 331                           | Scaffold-3:2892126:2904582:+   |
|                                | Toll-7      | Sfur-11.171  | 1323                          | Scaffold-11:3191439:3195849:+  |
|                                | Toll-6      | Sfur-176.31  | 1288                          | Scaffold-176:731355:735465:+   |
|                                | Toll-8      | Sfur-29.104  | 1721                          | Scaffold-29:1823673:1855334:-  |
|                                | Toll-10     | Sfur-230.19  | 1296                          | Scaffold-230:225496:259339:-   |
|                                | Toll-13     | Sfur-122.298 | 866                           | Scaffold-122:5156187:5168119:- |
|                                | FoxK        | Sfur-72.391  | 552                           | Scaffold-72:7390551:7418684:-  |
| G9a                            | Sfur-11.142 | 1375         | Scaffold-11:2817660:2844784:- |                                |
| antimicrobial humoral response | alphaTub84B | Sfur-114.27  | 450                           | Scaffold-114:390989:395994:-   |
|                                |             | Sfur-45.44   | 856                           | Scaffold-45:908888:927508:+    |
|                                |             | Sfur-450.13  | 504                           | Scaffold-450:174663:179960:+   |
|                                |             | Sfur-22.63   | 451                           | Scaffold-22:1702506:1744788:-  |
|                                |             | Sfur-214.43  | 808                           | Scaffold-214:740479:759618:-   |
|                                |             | Sfur-9.290   | 685                           | Scaffold-9:5208697:5237177:+   |
|                                | Dlg5        | Sfur-33.149  | 1937                          | Scaffold-33:2476623:2525174:+  |
|                                | dos         | Sfur-19.265  | 668                           | Scaffold-19:5424741:5445662:+  |
|                                | Eip75B      | Sfur-40.72   | 942                           | Scaffold-40:1654489:1681434:+  |
|                                | lola        | Sfur-124.39  | 355                           | Scaffold-124:859866:869751:-   |
|                                | lysozyme    | Sfur-11.139  | 154                           | Scaffold-11:2779444:2782951:-  |
|                                |             | Sfur-145.15  | 307                           | Scaffold-145:293700:304175:-   |
|                                |             | Sfur-53.22   | 174                           | Scaffold-53:313172:333372:+    |
|                                |             | Sfur-85.10   | 278                           | Scaffold-85:229207:239997:+    |
|                                |             | Sfur-85.9    | 156                           | Scaffold-85:223212:227637:+    |
|                                | mbo         | Sfur-7.118   | 501                           | Scaffold-7:3076245:3112006:+   |
|                                | Mef2        | Sfur-35.38   | 709                           | Scaffold-35:554076:603181:+    |
|                                | Ntf-2       | Sfur-9.95    | 131                           | Scaffold-9:1506325:1512416:+   |
|                                | par-1       | Sfur-14.79   | 579                           | Scaffold-14:1657393:1695616:+  |
|                                | Parp        | Sfur-72.107  | 1092                          | Scaffold-72:1769730:1789955:-  |
| PCNA                           | Sfur-74.129 | 261          | Scaffold-74:1594683:1599801:- |                                |
| smog                           | Sfur-56.66  | 675          | Scaffold-56:1559920:1575568:- |                                |

|                                 |               |              |                               |                                |
|---------------------------------|---------------|--------------|-------------------------------|--------------------------------|
|                                 | Ptip          | Sfur-49.48   | 1425                          | Scaffold-49:1229167:1288615:+  |
|                                 | Pvr           | Sfur-27.55   | 2106                          | Scaffold-27:917936:947832:-    |
|                                 |               | Sfur-170.3   | 818                           | Scaffold-170:25331:45602:+     |
|                                 | Rab11         | Sfur-13.193  | 216                           | Scaffold-13:3151181:3168837:+  |
|                                 | scrib         | Sfur-347.18  | 1837                          | Scaffold-347:240129:358804:+   |
|                                 | Spt6          | Sfur-98.17   | 1806                          | Scaffold-98:343206:382860:-    |
|                                 | Thor          | Sfur-207.15  | 119                           | Scaffold-207:346434:353919:+   |
|                                 | Tlk           | Sfur-682.3   | 933                           | Scaffold-682:17219:73518:+     |
|                                 | Vps15         | Sfur-270.24  | 1339                          | Scaffold-270:459835:498283:+   |
|                                 | vvl           | Sfur-250.11  | 433                           | Scaffold-250:190874:192196:-   |
|                                 | zfh1          | Sfur-36.98   | 912                           | Scaffold-36:2026389:2055531:-  |
| antimicrobial peptide           | Defensin      | Sfur-10.120  | 340                           | Scaffold-10:2352765:2370451:+  |
|                                 |               | Sfur-33.51   | 262                           | Scaffold-33:660700:668230:+    |
|                                 | NOS           | Sfur-9.52    | 1383                          | Scaffold-9:663560:726000:-     |
| encapsulation of foreign target | alpha-Man-Ia  | Sfur-17.159  | 525                           | Scaffold-17:3405714:3418388:-  |
|                                 | alpha-Man-Ib  | Sfur-241.29  | 834                           | Scaffold-241:636578:661827:+   |
|                                 |               | Sfur-489.8   | 585                           | Scaffold-489:254802:271669:-   |
|                                 | alpha-Man-IIa | Sfur-39.3    | 1116                          | Scaffold-39:15322:46715:-      |
|                                 | alpha-Man-IIb | Sfur-129.28  | 1650                          | Scaffold-129:429695:442551:-   |
|                                 |               | Sfur-825.7   | 588                           | Scaffold-825:85354:94586:+     |
|                                 |               | Sfur-70.20   | 1030                          | Scaffold-70:239001:296085:+    |
|                                 | Als2          | Sfur-494.2   | 1647                          | Scaffold-494:26614:63132:-     |
|                                 | aPKC          | Sfur-116.56  | 597                           | Scaffold-116:1045903:1097143:+ |
|                                 | Cdc42         | Sfur-171.14  | 650                           | Scaffold-171:343914:368853:+   |
|                                 | Cdk5alpha     | Sfur-50.56   | 303                           | Scaffold-50:739988:745845:-    |
|                                 |               | Sfur-150.22  | 282                           | Scaffold-150:434390:435235:-   |
|                                 |               | Sfur-150.19  | 213                           | Scaffold-150:407613:409827:-   |
|                                 | DCTN1-p150    | Sfur-85.11   | 1283                          | Scaffold-85:241112:278049:-    |
|                                 | DCX-EMAP      | Sfur-518.5   | 410                           | Scaffold-518:98833:107254:+    |
|                                 | Dhc64C        | Sfur-63.19   | 4660                          | Scaffold-63:296196:374130:-    |
|                                 | dia           | Sfur-20.194  | 1060                          | Scaffold-20:5305796:5347302:+  |
|                                 | Eph           | Sfur-18.207  | 835                           | Scaffold-18:3960077:4010736:-  |
|                                 | Ephrin        | Sfur-15.173  | 554                           | Scaffold-15:4094700:4142237:+  |
|                                 | Exn           | Sfur-877.3   | 1999                          | Scaffold-877:14368:47954:+     |
|                                 | Flo2          | Sfur-229.21  | 425                           | Scaffold-229:370218:371492:-   |
|                                 | LanA          | Sfur-359.5   | 3683                          | Scaffold-359:105895:174267:+   |
|                                 | OstDelta      | Sfur-223.18  | 1578                          | Scaffold-223:267985:291271:+   |
|                                 | Ostgamma      | Sfur-324.8   | 699                           | Scaffold-324:181936:222244:-   |
|                                 | RhoBTB        | Sfur-33.154  | 1331                          | Scaffold-33:2587153:2633646:-  |
|                                 | RhoGEF3       | Sfur-18.90   | 1075                          | Scaffold-18:1959210:1997732:-  |
|                                 | Shc           | Sfur-11755.1 | 153                           | Scaffold-11755:17:677:-        |
| Sfur-54.85                      |               | 597          | Scaffold-54:1579537:1581507:- |                                |
| Sfur-54.99                      |               | 1176         | Scaffold-54:1742096:1780551:- |                                |

|                                        |             |             |                               |                               |
|----------------------------------------|-------------|-------------|-------------------------------|-------------------------------|
|                                        | Vav         | Sfur-23.69  | 1713                          | Scaffold-23:1307574:1338992:- |
|                                        | Zir         | Sfur-1433.1 | 1661                          | Scaffold-1433:28:24184:-      |
|                                        |             | Sfur-440.5  | 2606                          | Scaffold-440:306742:330262:+  |
| phagocytosis                           | crq         | Sfur-51.4   | 1564                          | Scaffold-51:42730:124978:+    |
|                                        |             | Sfur-13.116 | 547                           | Scaffold-13:1948339:1978094:+ |
|                                        | brm         | Sfur-108.44 | 1476                          | Scaffold-108:763820:783750:-  |
|                                        |             | Sfur-598.8  | 1267                          | Scaffold-598:148332:179894:+  |
|                                        | EcR         | Sfur-50.12  | 619                           | Scaffold-50:203218:222293:-   |
|                                        | pnt         | Sfur-57.78  | 392                           | Scaffold-57:1777646:1805416:- |
|                                        | betaCOP     | Sfur-431.10 | 916                           | Scaffold-431:152224:163621:+  |
|                                        | gcm         | Sfur-28.6   | 572                           | Scaffold-28:112031:121193:-   |
|                                        |             | Sfur-84.70  | 629                           | Scaffold-84:1328003:1344380:- |
|                                        | Trn         | Sfur-69.5   | 929                           | Scaffold-69:126622:205028:+   |
|                                        | DMAP1       | Sfur-85.55  | 2735                          | Scaffold-85:981301:1019407:+  |
|                                        | Nup98-96    | Sfur-16.163 | 1988                          | Scaffold-16:3378124:3436367:+ |
|                                        |             | Sfur-1672.1 | 572                           | Scaffold-1672:1280:19310:+    |
|                                        |             | Sfur-1251.1 | 253                           | Scaffold-1251:6001:18296:+    |
| kuz                                    | Sfur-192.21 | 789         | Scaffold-192:451807:476216:+  |                               |
| mucosal immune response                | bbg         | Sfur-38.58  | 1436                          | Scaffold-38:897161:916430:-   |
|                                        | Duox        | Sfur-829.6  | 816                           | Scaffold-829:73630:99301:-    |
|                                        |             | Sfur-921.1  | 422                           | Scaffold-921:5453:14209:+     |
|                                        | Galphaq     | Sfur-72.236 | 354                           | Scaffold-72:3794880:3840867:- |
|                                        | lic         | Sfur-14.118 | 331                           | Scaffold-14:2407999:2417460:+ |
|                                        | Mekk1       | Sfur-17.172 | 1315                          | Scaffold-17:3644468:3679361:- |
|                                        | Mkp3        | Sfur-67.335 | 662                           | Scaffold-67:4917358:4947390:+ |
|                                        | norpA       | Sfur-268.14 | 1904                          | Scaffold-268:197055:265330:-  |
|                                        |             | Sfur-68.11  | 1079                          | Scaffold-68:201289:241336:+   |
| Sfur-226.20                            |             | 1202        | Scaffold-226:343583:379944:+  |                               |
| p38                                    | Sfur-17.307 | 622         | Scaffold-17:6675902:6707748:+ |                               |
| negative regulation of immune response | Atg6        | Sfur-596.2  | 373                           | Scaffold-596:22962:36274:-    |
|                                        | dnr1        | Sfur-20.247 | 883                           | Scaffold-20:6267460:6306119:- |
|                                        | Dsp1        | Sfur-246.15 | 210                           | Scaffold-246:252378:274923:-  |
|                                        |             | Sfur-246.14 | 1047                          | Scaffold-246:220688:247583:-  |
|                                        | faf         | Sfur-8.174  | 2764                          | Scaffold-8:3190206:3253519:+  |
|                                        | GlyP        | Sfur-487.5  | 1675                          | Scaffold-487:130966:195898:+  |
|                                        | Lam         | Sfur-197.34 | 549                           | Scaffold-197:575614:600981:+  |
|                                        | MED6        | Sfur-295.17 | 214                           | Scaffold-295:294849:302320:+  |
|                                        |             | Sfur-951.1  | 234                           | Scaffold-951:46501:56132:-    |
|                                        | Prx5        | Sfur-68.55  | 818                           | Scaffold-68:1213546:1255072:- |
|                                        | Rala        | Sfur-727.2  | 308                           | Scaffold-727:65697:77873:+    |
|                                        | RYBP        | Sfur-7.142  | 669                           | Scaffold-7:3890807:3912355:-  |
| sax                                    | Sfur-20.106 | 651         | Scaffold-20:3024141:3078538:+ |                               |
| scny                                   | Sfur-84.32  | 1041        | Scaffold-84:431035:455442:+   |                               |

|                                        |             |             |                              |                               |
|----------------------------------------|-------------|-------------|------------------------------|-------------------------------|
|                                        | slif        | Sfur-230.42 | 1500                         | Scaffold-230:665771:699639:-  |
|                                        |             | Sfur-50.193 | 727                          | Scaffold-50:2444004:2475761:+ |
|                                        |             | Sfur-345.27 | 957                          | Scaffold-345:420402:455888:+  |
|                                        | SP2353      | Sfur-197.44 | 308                          | Scaffold-197:788821:808743:+  |
|                                        | tefu        | Sfur-158.19 | 2853                         | Scaffold-158:190732:276365:+  |
|                                        | Tim10       | Sfur-338.15 | 96                           | Scaffold-338:290741:295170:+  |
|                                        | unc-45      | Sfur-97.14  | 946                          | Scaffold-97:277855:280692:+   |
|                                        | Usp2        | Sfur-20.70  | 517                          | Scaffold-20:2065496:2082524:+ |
|                                        | Nrf2        | Sfur-9.282  | 637                          | Scaffold-9:4962381:5019134:-  |
|                                        | wun         | Sfur-273.10 | 279                          | Scaffold-273:78819:104116:+   |
| positive regulation of immune response | att-ORFA    | Sfur-622.8  | 321                          | Scaffold-622:155464:169124:+  |
|                                        | CG2051      | Sfur-16.19  | 411                          | Scaffold-16:349132:369417:-   |
|                                        | CG32795     | Sfur-32.48  | 646                          | Scaffold-32:380915:398262:+   |
|                                        | chico       | Sfur-77.62  | 1062                         | Scaffold-77:999570:1011562:-  |
|                                        | Crag        | Sfur-89.92  | 1869                         | Scaffold-89:1344519:1427737:- |
|                                        | Etl1        | Sfur-181.1  | 1542                         | Scaffold-181:1329:26514:+     |
|                                        | HBS1        | Sfur-134.8  | 1321                         | Scaffold-134:193802:219154:-  |
|                                        | Hr78        | Sfur-162.14 | 656                          | Scaffold-162:279768:292433:+  |
|                                        | htl         | Sfur-27.19  | 1019                         | Scaffold-27:447830:489575:-   |
|                                        | Ide         | Sfur-36.56  | 967                          | Scaffold-36:1028818:1051118:+ |
|                                        | kug         | Sfur-369.15 | 3149                         | Scaffold-369:201228:270273:+  |
|                                        |             | Sfur-316.19 | 2937                         | Scaffold-316:361388:448023:+  |
|                                        |             | Sfur-6.221  | 3111                         | Scaffold-6:3682324:3750622:+  |
|                                        |             | Sfur-316.13 | 612                          | Scaffold-316:221741:223576:+  |
|                                        |             | Sfur-6.194  | 1141                         | Scaffold-6:3372268:3375690:+  |
|                                        | LanB1       | Sfur-24.172 | 1752                         | Scaffold-24:4571900:4606027:+ |
|                                        | Mmp2        | Sfur-259.18 | 494                          | Scaffold-259:381746:394957:+  |
|                                        | mtd         | Sfur-8.143  | 960                          | Scaffold-8:2391353:2526890:-  |
| PDCD-5                                 | Sfur-169.12 | 130         | Scaffold-169:413640:417815:- |                               |
| puc                                    | Sfur-167.52 | 266         | Scaffold-167:758620:801656:+ |                               |
| Sec31                                  | Sfur-11.25  | 1849        | Scaffold-11:621923:686736:+  |                               |
| immune response                        | Atf3        | Sfur-125.49 | 525                          | Scaffold-125:908975:918974:+  |
|                                        | cher        | Sfur-7.140  | 2355                         | Scaffold-7:3611650:3797156:+  |
|                                        | CSN5        | Sfur-44.49  | 345                          | Scaffold-44:814419:818993:-   |
|                                        | Deaf1       | Sfur-438.6  | 500                          | Scaffold-438:156032:178237:+  |
|                                        | eya         | Sfur-20.138 | 776                          | Scaffold-20:3947459:3975228:+ |
|                                        | modSP       | Sfur-102.37 | 1173                         | Scaffold-102:890003:915418:+  |
|                                        |             | Sfur-79.44  | 712                          | Scaffold-79:726696:746148:-   |
|                                        | Reeler      | Sfur-159.27 | 270                          | Scaffold-159:455725:466829:+  |
|                                        | Uba2        | Sfur-594.3  | 642                          | Scaffold-594:33778:53907:-    |
|                                        |             | Sfur-691.11 | 577                          | Scaffold-691:147456:160638:-  |
|                                        | Vps16B      | Sfur-97.22  | 440                          | Scaffold-97:493395:503004:+   |
| Vps33B                                 | Sfur-107.10 | 738         | Scaffold-107:221949:231075:- |                               |

|                                |                                |             |      |                                |
|--------------------------------|--------------------------------|-------------|------|--------------------------------|
| Caspase                        | Caspase                        | Sfur-17.341 | 291  | Scaffold-17:7425599:7442532:+  |
|                                | Caspase                        | Sfur-6.178  | 1178 | Scaffold-6:3076669:3121666:+   |
|                                | Caspase                        | Sfur-1194.2 | 602  | Scaffold-1194:25502:35039:-    |
|                                | Caspase                        | Sfur-23.136 | 781  | Scaffold-23:2651782:2681095:-  |
|                                | Caspase                        | Sfur-739.1  | 598  | Scaffold-739:13669:21225:+     |
|                                | Caspase                        | Sfur-460.16 | 658  | Scaffold-460:288818:301975:+   |
|                                | Caspase                        | Sfur-24.353 | 793  | Scaffold-24:8701529:8717817:+  |
| Catalase                       | Catalase                       | Sfur-314.12 | 504  | Scaffold-314:185421:217844:-   |
| Fibrinogen-like Proteins       | Fibrinogen-like Proteins       | Sfur-418.10 | 746  | Scaffold-418:136687:164330:-   |
|                                | Fibrinogen-like Proteins       | Sfur-72.247 | 1931 | Scaffold-72:3955028:3966237:+  |
| IAP Repeat                     | IAP Repeat                     | Sfur-234.14 | 4551 | Scaffold-234:284350:376956:+   |
|                                | IAP Repeat                     | Sfur-119.29 | 235  | Scaffold-119:602787:617554:-   |
| MD-2-related lipid recognition | MD-2-related lipid recognition | Sfur-283.24 | 172  | Scaffold-283:474795:478468:+   |
| Scavenger Receptors            | Scavenger Receptors            | Sfur-28.74  | 911  | Scaffold-28:1397713:1437306:+  |
|                                | Scavenger Receptors            | Sfur-65.66  | 1310 | Scaffold-65:1462168:1501916:+  |
|                                | Scavenger Receptors            | Sfur-101.93 | 931  | Scaffold-101:1324443:1379975:- |
|                                | Scavenger Receptors            | Sfur-84.65  | 198  | Scaffold-84:1250921:1256071:+  |
|                                | Scavenger Receptors            | Sfur-38.96  | 2869 | Scaffold-38:1336839:1445976:+  |
|                                | Scavenger Receptors            | Sfur-982.3  | 611  | Scaffold-982:43664:55543:-     |
|                                | Scavenger Receptors            | Sfur-113.6  | 3665 | Scaffold-113:75649:181553:+    |
|                                | Scavenger Receptors            | Sfur-74.3   | 467  | Scaffold-74:32128:58667:-      |
|                                | Scavenger Receptors            | Sfur-168.24 | 1040 | Scaffold-168:469889:496900:-   |
|                                | Scavenger Receptors            | Sfur-17.355 | 596  | Scaffold-17:7698657:7718981:+  |
|                                | Scavenger Receptors            | Sfur-15.137 | 586  | Scaffold-15:3005222:3080960:+  |
|                                | Scavenger Receptors            | Sfur-1.36   | 507  | Scaffold-1:740692:752444:+     |
|                                | Scavenger Receptors            | Sfur-15.133 | 1136 | Scaffold-15:2944056:2982430:+  |

|                              |                              |             |                               |                                 |
|------------------------------|------------------------------|-------------|-------------------------------|---------------------------------|
| Spatzle                      | Spatzle                      | Sfur-54.115 | 566                           | Scaffold-54:2058372:2079173:+   |
|                              | Spatzle                      | Sfur-5.212  | 507                           | Scaffold-5:4596404:4604268:-    |
|                              | Spatzle                      | Sfur-24.293 | 390                           | Scaffold-24:7169425:7216883:+   |
|                              | Spatzle                      | Sfur-166.29 | 436                           | Scaffold-166:571154:592970:+    |
|                              | Spatzle                      | Sfur-261.1  | 1830                          | Scaffold-261:1218:105685:+      |
|                              | Spatzle                      | Sfur-72.508 | 541                           | Scaffold-72:10049305:10066841:- |
|                              | Spatzle                      | Sfur-33.150 | 507                           | Scaffold-33:2533097:2541457:-   |
| Superoxide dismutase         | Superoxide dismutase         | Sfur-13.25  | 930                           | Scaffold-13:297893:301420:-     |
|                              | Superoxide dismutase         | Sfur-41.88  | 2235                          | Scaffold-41:2344888:2360466:+   |
|                              | Superoxide dismutase         | Sfur-8.79   | 1684                          | Scaffold-8:1073640:1081782:-    |
|                              | Superoxide dismutase         | Sfur-23.71  | 349                           | Scaffold-23:1354194:1372952:-   |
|                              | Superoxide dismutase         | Sfur-33.90  | 465                           | Scaffold-33:1452813:1478112:-   |
|                              | Superoxide dismutase         | Sfur-67.126 | 561                           | Scaffold-67:1680925:1698744:-   |
|                              | Superoxide dismutase         | Sfur-67.143 | 348                           | Scaffold-67:1838161:1869273:-   |
| Thioester-containing protein | Thioester-containing protein | Sfur-70.51  | 2555                          | Scaffold-70:831849:919436:+     |
| peroxidase                   | peroxidase                   | Sfur-219.18 | 1120                          | Scaffold-219:248013:300149:+    |
|                              | peroxidase                   | Sfur-126.46 | 1216                          | Scaffold-126:746464:797465:-    |
|                              | peroxidase                   | Sfur-46.51  | 2353                          | Scaffold-46:1175066:1240084:-   |
|                              | peroxidase                   | Sfur-77.96  | 1362                          | Scaffold-77:1494315:1530461:-   |
|                              | peroxidase                   | Sfur-18.30  | 576                           | Scaffold-18:655849:697622:-     |
|                              | peroxidase                   | Sfur-120.36 | 2359                          | Scaffold-120:852675:919715:+    |
|                              | peroxidase                   | Sfur-273.7  | 234                           | Scaffold-273:62169:73061:+      |
|                              | peroxidase                   | Sfur-47.125 | 2918                          | Scaffold-47:2235742:2293595:-   |
|                              | peroxidase                   | Sfur-30.107 | 1499                          | Scaffold-30:2304735:2336216:+   |
|                              | peroxidase                   | Sfur-15.277 | 199                           | Scaffold-15:6434239:6443533:-   |
|                              | peroxidase                   | Sfur-65.41  | 1425                          | Scaffold-65:860460:898413:+     |
|                              | peroxidase                   | Sfur-17.242 | 3270                          | Scaffold-17:5223007:5297678:+   |
|                              | peroxidase                   | Sfur-430.8  | 409                           | Scaffold-430:169988:185780:-    |
|                              | peroxidase                   | Sfur-6.74   | 255                           | Scaffold-6:1300928:1301945:+    |
|                              | peroxidase                   | Sfur-22.68  | 265                           | Scaffold-22:1849864:1857820:-   |
|                              | peroxidase                   | Sfur-128.19 | 221                           | Scaffold-128:569294:576632:+    |
| peroxidase                   | Sfur-22.79                   | 184         | Scaffold-22:2064821:2069885:- |                                 |

Note: The detailed gene sequence will be available on the link <http://staff.ustc.edu.cn/~wuqf/resources.html>

**Table S2. Classification of immune related genes of *S. furcifera*, *N. lugens* and *D. Melanogaster***

| category         | gene name | <i>S. furcifera</i> | <i>N. lugens</i>                         | <i>D. melanogaster</i> |
|------------------|-----------|---------------------|------------------------------------------|------------------------|
| RNA interference | AG02      | S. fur-72. 600      | NLU002433. 1                             | FBgn0087035            |
|                  | Dcr-2     | S. fur-139. 28      | NLU028676. 1                             | FBgn0034246            |
|                  | r2d2      | S. fur-20. 248      | NLU009200. 1                             | FBgn0031951            |
|                  | loqs      | S. fur-50. 248      | NLU021888. 1                             | FBgn0032515            |
|                  | Hen1      | S. fur-230. 43      | NLU016076. 1, NLU019297. 1, NLU016075. 1 | FBgn0033686            |
|                  | drosha    | S. fur-223. 33      | NLU024074. 1                             | FBgn0026722            |
|                  | pasha     | S. fur-504. 10      | NLU019062. 1, NLU025792. 1               | FBgn0039861            |
|                  | dicer-1   | S. fur-151. 9       | NLU006786. 1                             | FBgn0039016            |
|                  | AG01      | S. fur-63. 27       | NLU002737. 1                             | FBgn0262739            |
|                  | AG03      | S. fur-63. 71       | NLU019917. 2                             | FBgn0250816            |
|                  | translin  | S. fur-450. 9       | /                                        | /                      |
|                  |           | S. fur-148. 30      |                                          |                        |
|                  | Fmr1      | S. fur-172. 36      | NLU028700. 1                             | FBgn0028734            |
|                  | armitage  | S. fur-326. 2       | NLU005908. 1                             | FBgn0041164            |
|                  | spn-E     | S. fur-513. 9       | NLU012389. 1                             | FBgn0003483            |
|                  | CRIF      | S. fur-6. 74        | NLU004434. 1                             | FBgn0037102            |
|                  | CG17265   | S. fur-542. 11      | NLU010721. 1, NLU016057. 1               | FBgn0031488            |
|                  |           | S. fur-641. 4       |                                          |                        |
|                  | Cbp80     | S. fur-19. 148      | NLU019101. 1                             | FBgn0022942            |



|                           |           |                                  |                            |                             |
|---------------------------|-----------|----------------------------------|----------------------------|-----------------------------|
|                           | Cbp20     | /                                | NLU017365. 1               | FBgn0022943                 |
|                           | Elp1      | S. fur-72. 23                    | /                          | FBgn0037926                 |
|                           | Tis11     | S. fur-267. 17                   | NLU026267. 1               | FBgn0011837                 |
|                           | Ars2      | S. fur-17. 78                    | NLU025386. 1               | FBgn0033062                 |
|                           | blanks    | /                                | /                          | FBgn0035608,<br>FBgn0035571 |
|                           | piwi      | /                                | NLU020171. 1               | FBgn0004872                 |
|                           | aubergine | S. fur-22. 29                    | NLU014209. 1               | FBgn0000146                 |
|                           | ppk29     | /                                | /                          | FBgn0034965                 |
|                           | pcm       | S. fur-503. 9                    | NLU016288. 1               | FBgn0020261                 |
|                           | bel       | S. fur-72. 131                   | NLU014452. 1               | FBgn0263231                 |
|                           | hdc       | S. fur-17. 133<br>S. fur-17. 131 | NLU003528. 1, NLU003527. 1 | FBgn0010113                 |
| Toll signaling<br>pathway | cact      | S. fur-184. 26                   | NLU007600. 1               | FBgn0000250                 |
|                           | Myd88     | S. fur-169. 16                   | NLU015637. 1, NLU015640. 1 | FBgn0033402                 |
|                           | Pelle     | S. fur-95. 27                    | NLU007825. 1               | FBgn0010441                 |
|                           | spz       | S. fur-54. 115                   | NLU023813. 1               | FBgn0003495                 |
|                           | spz2      | /                                | /                          | FBgn0261526                 |
|                           | spz3      | S. fur-24. 293                   | NLU021391. 1, NLU019692. 1 | FBgn0031959                 |
|                           | spz4      | S. fur-33. 150                   | NLU006163. 1               | FBgn0032362                 |
|                           | spz5      | S. fur-261. 1                    | NLU021217. 1               | FBgn0035379                 |
|                           | spz6      | S. fur-5. 212                    | NLU021599. 1, NLU021596. 1 | FBgn0035056                 |
|                           | T1        | S. fur-33. 32                    | NLU007992. 1, NLU025956. 1 | FBgn0262473                 |
|                           | Dorsal    | S. fur-213. 33                   | NLU004660. 1               | FBgn0260632                 |

|                       |                |                 |                            |             |
|-----------------------|----------------|-----------------|----------------------------|-------------|
|                       | Dif            | S. fur-152. 4   | NLU001982. 1               | FBgn0011274 |
|                       | tollip         | S. fur-1. 116   | NLU024621. 1               | /           |
|                       | tube           | S. fur-23. 126  | /                          | FBgn0003882 |
|                       | lwr            | /               | NLU009395. 1               | FBgn0010602 |
|                       | Hel89B         | S. fur-72. 337  | NLU002799. 1               | FBgn0022787 |
|                       | Pli            | S. fur-141. 21  | NLU008334. 3               | FBgn0025574 |
|                       | Ulp1           | S. fur-374. 8   | /                          | FBgn0027603 |
|                       | mop            | S. fur-120. 31  | NLU007526. 1               | FBgn0036448 |
|                       |                | S. fur-222. 1   |                            |             |
|                       | puf            | S. fur-76. 16   | NLU015336. 1, NLU015334. 1 | FBgn0039214 |
|                       | krz            | S. fur-223. 13  | NLU028087. 2               | FBgn0040206 |
|                       | Gprk2          | S. fur-20. 8    | NLU001194. 1               | FBgn0261988 |
| IMD signaling pathway | caspar         | S. fur-17. 324  | NLU013036. 1, NLU017992. 1 | FBgn0034068 |
|                       |                | S. fur-150. 27  | NLU019739. 1               | /           |
|                       |                | /               | /                          | FBgn0025608 |
|                       | Diap2          | /               | NLU021557. 1, NLU021593. 1 | FBgn0015247 |
|                       | Diap1          | S. fur-529. 12  | NLU002427. 1, NLU025325. 1 | FBgn0260635 |
|                       | IKKbeta        | /               | NLU025262. 1               | FBgn0024222 |
|                       | IKKgamma (key) | S. fur-13. 59   | /                          | FBgn0041205 |
|                       | IKKepsilon     | S. fur-410. 14  | NLU019937. 1               | FBgn0086657 |
|                       | imd            | S. fur-17. 218  | NLU011186. 1               | FBgn0013983 |
|                       | Rel            | S. fur-1444. 20 | NLU002823. 1               | FBgn0014018 |
|                       | Tab2           | S. fur-186. 23  | NLU006103. 1               | FBgn0086358 |
|                       | Tak1           | S. fur-9. 184   | NLU003382. 2               | FBgn0026323 |

|                  |                |                 |                                          |             |
|------------------|----------------|-----------------|------------------------------------------|-------------|
|                  | Dredd          | S. fur-460. 16  | /                                        | FBgn0020381 |
|                  |                | /               |                                          |             |
|                  | Traf-like      | S. fur-17. 342  | NLU005471. 1                             | FBgn0030748 |
|                  | Traf4          | S. fur-66. 92   | NLU024884. 1                             | FBgn0026319 |
|                  | Traf6          | /               | NLU016291. 2, NLU017152. 1               | FBgn0265464 |
|                  | Ubc13          | S. fur-251. 194 | NLU022111. 1                             | FBgn0000173 |
|                  | TM9SF2         | S. fur-184. 28  | NLU010276. 1                             | FBgn0032880 |
|                  |                | S. fur-396. 5   |                                          |             |
|                  | TM9SF4         | S. fur-70. 81   | NLU013705. 1, NLU024056. 2               | FBgn0028541 |
|                  | Npc2a          | /               | /                                        | FBgn0031381 |
|                  | Npc2e          | /               | /                                        | FBgn0051410 |
| pirk             | /              | /               | FBgn0034647                              |             |
| JAK-STAT cascade | dome           | S. fur-27. 95   | /                                        | FBgn0043903 |
|                  | hop            | S. fur-24. 235  | NLU018705. 1, NLU018707. 1               | FBgn0004864 |
|                  | Stat92E        | S. fur-86. 26   | NLU009978. 1                             | FBgn0016917 |
|                  | Su(var)2-10    | S. fur-38. 48   | NLU002060. 2                             | FBgn0003612 |
|                  | upd1           | /               | /                                        | FBgn0004956 |
|                  | upd2           | /               | /                                        | FBgn0030904 |
|                  | upd3           | /               | /                                        | FBgn0053542 |
|                  | vir-1          | /               | /                                        | FBgn0043841 |
|                  | Socs36E        | S. fur-101. 37  | NLU008288. 1, NLU027078. 1, NLU005783. 1 | FBgn0041184 |
|                  |                | S. fur-28. 3    |                                          |             |
|                  |                | S. fur-315. 10  |                                          |             |
| Socs16D          | S. fur-289. 13 | NLU004891. 1    | FBgn0030869                              |             |
| Socs44A          | S. fur-64. 68  | NLU007597. 1    | FBgn0033266                              |             |

|                                  |        |                                                  |                                                                              |                                           |
|----------------------------------|--------|--------------------------------------------------|------------------------------------------------------------------------------|-------------------------------------------|
|                                  | E(bx)  | S. fur-40. 46                                    | NLU007175. 1, NLU007172. 1                                                   | FBgn0000541                               |
|                                  | kn     | S. fur-114. 36                                   | NLU011325. 1                                                                 | FBgn0001319                               |
|                                  | asrij  | S. fur-51. 78                                    | NLU017830. 3                                                                 | FBgn0034793                               |
|                                  | mask   | S. fur-161. 6                                    | NLU006840. 1                                                                 | FBgn0043884                               |
| melanization<br>defense response | PPO    | S. fur-106. 2, S. fur-283. 14,<br>S. fur-62. 181 | NLU002909. 1, NLU022227. 1, NLU<br>022111. 1, NLU006547. 1, NLU002<br>910. 1 | FBgn0033367, FBgn02613<br>63, FBgn0261362 |
|                                  | serpin | S. fur-204. 21                                   | NLU003320. 1, NLU017458. 1                                                   | /                                         |
|                                  |        | S. fur-335. 4                                    | NLU005641. 1, NLU002506. 1                                                   | FBgn0263109                               |
|                                  |        | S. fur-350. 3                                    | NLU028092. 1                                                                 | FBgn0039795                               |
|                                  |        | S. fur-377. 2                                    | NLU013115. 1                                                                 | FBgn0037772                               |
|                                  |        | S. fur-45. 55                                    | NLU010255. 1                                                                 | FBgn0038299, FBgn00289<br>84              |
|                                  |        | S. fur-470. 6                                    | NLU008425. 1                                                                 | FBgn0031973                               |
|                                  |        | S. fur-2570. 1                                   |                                                                              |                                           |
|                                  |        | S. fur-71. 69                                    | NLU002705. 1                                                                 | /                                         |
|                                  |        | S. fur-88. 14                                    | NLU025039. 1                                                                 | /                                         |
|                                  |        | S. fur-97. 15                                    | /                                                                            | /                                         |
|                                  |        | /                                                | /                                                                            | FBgn0028990                               |
|                                  |        | /                                                | /                                                                            | FBgn0262057, FBgn00369<br>69, FBgn0036970 |
|                                  |        | /                                                | /                                                                            | FBgn0015586, FBgn00522<br>03              |
| /                                | /      | /                                                |                                                                              |                                           |

|                             |                |                            |                                                                                                                     |
|-----------------------------|----------------|----------------------------|---------------------------------------------------------------------------------------------------------------------|
|                             | /              | /                          | FBgn0028983, FBgn0028985, FBgn0033112,                                                                              |
|                             | /              | /                          | FBgn0002930, FBgn0032178, FBgn0044011, FBgn0024293, FBgn0024294, FBgn0034195,                                       |
|                             | /              | /                          | FBgn0028986, FBgn0028987, FBgn0028988, FBgn0083141, FBgn0051902, FBgn0053121, FBgn0033113, FBgn0033574, FBgn0033115 |
| CLIP-domain serine protease | S. fur-364. 6  | NLU015564. 1, NLU008637. 5 | FBgn0038727, FBgn0036891                                                                                            |
|                             | S. fur-389. 3  |                            |                                                                                                                     |
|                             | S. fur-745. 2  | NLU028830. 1               | FBgn0030927                                                                                                         |
|                             | S. fur-49. 2   | NLU018819. 2, NLU018820. 1 | FBgn0035501, FBgn0052260                                                                                            |
|                             | S. fur-234. 17 | NLU018349. 1, NLU016731. 1 | FBgn0003450, FBgn0030051                                                                                            |
|                             | S. fur-54. 75  |                            |                                                                                                                     |
|                             | S. fur-9. 240  |                            |                                                                                                                     |
|                             | /              | /                          | FBgn0085438                                                                                                         |
|                             | /              | /                          | FBgn0030925, FBgn0030926                                                                                            |
|                             | /              | /                          | FBgn0039494, FBgn0039495                                                                                            |

|                              |          |                |                            |                                                                                           |
|------------------------------|----------|----------------|----------------------------|-------------------------------------------------------------------------------------------|
|                              |          | /              | /                          | FBgn0019929                                                                               |
|                              |          | /              | /                          | FBgn0039759, FBgn0039798                                                                  |
|                              |          | /              | /                          | FBgn0039758, FBgn0000533, FBgn0027930, FBgn0039102, FBgn0038250, FBgn0039101, FBgn0042106 |
|                              |          | /              | /                          | FBgn0051728                                                                               |
|                              |          | /              | /                          | /                                                                                         |
|                              |          | /              | /                          | /                                                                                         |
|                              | bsk      | S. fur-95. 52  | NLU019825. 1               | FBgn0000229                                                                               |
|                              | Dark     | /              | /                          | FBgn0263864                                                                               |
|                              | Dronc    | /              | /                          | FBgn0026404                                                                               |
|                              | egr      | S. fur-88. 72  | /                          | FBgn0033483                                                                               |
|                              | hep      | S. fur-105. 58 | NLU015503. 1               | FBgn0010303                                                                               |
|                              | Rho1     | S. fur-15. 272 | /                          | FBgn0014020                                                                               |
|                              |          | S. fur-39. 58  |                            |                                                                                           |
| pattern recognition receptor | C-lectin | S. fur-115. 19 | NLU015710. 1, NLU010305. 1 | FBgn0001083                                                                               |
|                              |          | S. fur-1233. 4 | /                          | FBgn0035199                                                                               |
|                              |          | S. fur-135. 14 | NLU018769. 1               | FBgn0038315                                                                               |
|                              |          | S. fur-7. 132  | NLU009485. 1               | FBgn0037240, FBgn0034317, FBgn0034318                                                     |
|                              |          | S. fur-1591. 2 | NLU005367. 1               | FBgn0262720, FBgn0040502, FBgn0033067                                                     |

|  |                |                            |                                                                                                                                                                                                                                                                                              |
|--|----------------|----------------------------|----------------------------------------------------------------------------------------------------------------------------------------------------------------------------------------------------------------------------------------------------------------------------------------------|
|  | S. fur-20. 43  | NLU018248. 1               | FBgn0031629                                                                                                                                                                                                                                                                                  |
|  | S. fur-276. 9  |                            |                                                                                                                                                                                                                                                                                              |
|  | S. fur-925. 2  | NLU016070. 1, NLU012907. 1 | FBgn0031918                                                                                                                                                                                                                                                                                  |
|  | S. fur-635. 1  | NLU008455. 1               | FBgn0038017                                                                                                                                                                                                                                                                                  |
|  | S. fur-308. 14 | NLU011397. 1, NLU025259. 1 | FBgn0035031                                                                                                                                                                                                                                                                                  |
|  | S. fur-438. 7  | NLU009896. 1, NLU009897. 1 | FBgn0030617                                                                                                                                                                                                                                                                                  |
|  | /              | /                          | FBgn0029814, FBgn0261258                                                                                                                                                                                                                                                                     |
|  | /              | /                          | FBgn0053533, FBgn0040093, FBgn0040092, FBgn0030050, FBgn0262357, FBgn0259958, FBgn0053532, FBgn0016675, FBgn0040104, FBgn0264341, FBgn0259230, FBgn0040102, FBgn0040099, FBgn0031910, FBgn0031373, FBgn0040503, FBgn0040107, FBgn0040106, FBgn0031273, FBgn0040097, FBgn0040098, FBgn0015583 |
|  | /              | /                          | FBgn0054033, FBgn0040096, FBgn0031879                                                                                                                                                                                                                                                        |
|  | /              | /                          | FBgn0031571, FBgn00327                                                                                                                                                                                                                                                                       |

|           |                |                                              |                     |
|-----------|----------------|----------------------------------------------|---------------------|
|           |                |                                              | 70                  |
| GNBP      | S. fur-168. 43 | NLU026651. 1                                 | /                   |
|           | S. fur-449. 5  | NLU018508. 1, NLU022390. 1, NLU<br>029010. 1 | /                   |
|           | S. fur-186. 24 | NLU006102. 1, NLU014039. 2                   | FBgn0040322 (GNBP2) |
|           | S. fur-71. 64  |                                              |                     |
|           | /              | /                                            | FBgn0040323 (GNBP1) |
|           | /              | /                                            | FBgn0040321 (GNBP3) |
|           | /              | /                                            | /                   |
|           | /              | /                                            | /                   |
| PGRP-LC   | S. fur-122. 48 | NLU001564. 1                                 | FBgn0035976         |
| PGRP-LB   | S. fur-20. 196 | NLU006527. 1                                 | FBgn0037906         |
| PGRP-LA   | /              | /                                            | FBgn0035975         |
| PGRP-LD   | /              | /                                            | FBgn0260458         |
| PGRP-LE   | /              | /                                            | FBgn0030695         |
| PGRP-LF   | /              | /                                            | FBgn0035977         |
| PGRP-SA   | /              | /                                            | FBgn0030310         |
| PGRP-SB1  | /              | /                                            | FBgn0043578         |
| PGRP-SB2  | /              | /                                            | FBgn0043577         |
| PGRP-SC1a | /              | /                                            | FBgn0043576         |
| PGRP-SC1b | /              | /                                            | FBgn0033327         |
| PGRP-SC2  | /              | /                                            | FBgn0043575         |
| PGRP-SD   | /              | /                                            | FBgn0035806         |



|                           |           |                |                            |                          |
|---------------------------|-----------|----------------|----------------------------|--------------------------|
|                           | Draper    | S. fur-78. 16  | NLU010296. 1               | FBgn0027594              |
|                           | dscam     | S. fur-115. 24 | NLU015558. 1, NLU025113. 1 | /                        |
|                           |           | S. fur-160. 34 | NLU001230. 1               | /                        |
|                           |           | S. fur-17. 263 | NLU024552. 1               | /                        |
|                           |           | S. fur-205. 33 | NLU026279. 1               | /                        |
|                           |           | S. fur-413. 23 | NLU002721. 1               | FBgn0263218 (Dscam2)     |
|                           |           | S. fur-79. 65  | /                          | FBgn0263219 (Dscam4)     |
|                           |           | /              | NLU012705. 3               | FBgn0033159 (Dscam1)     |
|                           |           | /              | /                          | FBgn0261046 (Dscam3)     |
|                           |           | /              | /                          | /                        |
|                           | Eater     | S. fur-13. 168 | NLU028308. 1               | FBgn0243514              |
|                           | galectin  | S. fur-133. 5  | /                          | /                        |
|                           |           | S. fur-169. 42 | NLU004153. 1               | FBgn0031213, FBgn0031214 |
|                           |           | S. fur-9. 77   | NLU014787. 2               | FBgn0052226              |
|                           |           | /              | /                          | FBgn0031289, FBgn0034365 |
|                           |           | /              | /                          | FBgn0038419              |
|                           | hemocytin | S. fur-199. 20 | NLU018484. 2               | FBgn0029167              |
|                           |           | S. fur-769. 5  |                            |                          |
| defense response to virus | Atg18a    | S. fur-78. 63  | NLU020875. 1               | FBgn0035850              |
|                           | Atg7      | S. fur-146. 38 | NLU009932. 1               | FBgn0034366              |
|                           |           | S. fur-602. 5  |                            |                          |

|                                   |             |                               |                                 |                               |
|-----------------------------------|-------------|-------------------------------|---------------------------------|-------------------------------|
|                                   | CG10333     | S. fur-347. 22                | NLU014381. 1                    | FBgn0032690                   |
|                                   | CG12780     | /                             | /                               | FBgn0033301                   |
|                                   | me31B       | S. fur-169. 35                | NLU015620. 3                    | FBgn0004419                   |
|                                   | Mt2         | S. fur-3. 151                 | /                               | FBgn0028707                   |
|                                   | Toll-7      | S. fur-11. 171                | NLU009021. 1                    | FBgn0034476                   |
|                                   | Toll-6      | S. fur-176. 31                | NLU008392. 1                    | FBgn0036494                   |
|                                   | Toll-8      | S. fur-29. 104                | NLU027363. 1                    | FBgn0029114                   |
|                                   | Toll-10     | S. fur-230. 19                | NLU022764. 1                    | /                             |
|                                   | Toll-13     | S. fur-122. 298               | NLU027922. 1                    | /                             |
|                                   | Toll-2      | /                             | /                               | FBgn0004364                   |
|                                   | Toll-3      | /                             | /                               | FBgn0015770                   |
|                                   | Toll-4      | /                             | /                               | FBgn0032095                   |
|                                   | Toll-5      | /                             | /                               | FBgn0026760                   |
|                                   | Toll-9      | /                             | /                               | FBgn0036978                   |
|                                   | DIP1        | /                             | NLU014786. 1                    | FBgn0024807                   |
|                                   | FoxK        | S. fur-72. 391                | NLU006150. 1                    | FBgn0036134                   |
|                                   | G9a         | S. fur-11. 142                | NLU019099. 2                    | FBgn0040372                   |
| antimicrobial<br>humoral response | alphaTub84B | S. fur-114. 27                | NLU005428. 1, NLU004930. 1      | /                             |
|                                   |             | S. fur-45. 44                 | NLU007674. 1, NLU010638. 1      | /                             |
|                                   |             | S. fur-450. 13                | /                               | FBgn0003884 (alphaTub8<br>4B) |
|                                   |             | S. fur-22. 63                 | /                               | FBgn0003886 (alphaTub8<br>5E) |
|                                   |             | S. fur-214. 43, S. fur-9. 290 | NLU005541. 1, NLU009958. 1, NLU | FBgn0087040 (alphaTub6        |

|          |                |                            |                                                      |
|----------|----------------|----------------------------|------------------------------------------------------|
|          |                | 020924. 1, NLU008983. 1    | 7C)                                                  |
|          | /              | /                          | FBgn0003885 (alphaTub8 4D)                           |
| cad      | /              | NLU005601. 1               | FBgn0000251                                          |
| Dlg5     | S. fur-33. 149 | NLU006162. 1, NLU022716. 1 | FBgn0032363                                          |
| dos      | S. fur-19. 265 | NLU009379. 1               | FBgn0016794                                          |
| dup      | /              | NLU015058. 1, NLU015059. 1 | FBgn0000996                                          |
| E2f1     | /              | NLU014009. 1               | FBgn0011766                                          |
| Eip75B   | S. fur-40. 72  | NLU006196. 1               | FBgn0000568                                          |
| IMPPP    | /              | /                          | FBgn0033835                                          |
| kay      | /              | /                          | FBgn0001297                                          |
| lola     | S. fur-124. 39 | NLU007358. 1               | FBgn0005630                                          |
| lysozyme | S. fur-11. 139 | NLU018928. 1               | FBgn0035813                                          |
|          | S. fur-145. 15 | NLU013788. 1               | /                                                    |
|          | S. fur-53. 22  | NLU027010. 1               | /                                                    |
|          | S. fur-85. 10  | NLU021394. 1, NLU008673. 1 | /                                                    |
|          | S. fur-85. 9   |                            | /                                                    |
|          | /              | NLU017394. 1               | FBgn0025827, FBgn0034162, FBgn0034165, , FBgn0046999 |
|          | /              | /                          | FBgn0034539, FBgn0029765, FBgn0034538                |

|       |                |                            |                                                                                                                     |
|-------|----------------|----------------------------|---------------------------------------------------------------------------------------------------------------------|
|       | /              | /                          | FBgn0004425, FBgn0004426, FBgn0004427, FBgn0004428, FBgn0004429, FBgn0004430, FBgn0004431, FBgn0050062, FBgn0034092 |
|       | /              | /                          | /                                                                                                                   |
| mbo   | S. fur-7. 118  | /                          | FBgn0026207                                                                                                         |
| MED25 | /              | NLU002125. 3, NLU023106. 1 | FBgn0038760                                                                                                         |
| Mef2  | S. fur-35. 38  | NLU018410. 1, NLU018409. 1 | FBgn0011656                                                                                                         |
| Ntf-2 | S. fur-9. 95   | NLU013180. 3               | FBgn0031145                                                                                                         |
| par-1 | S. fur-14. 79  | NLU011670. 2, NLU011671. 1 | FBgn0260934                                                                                                         |
| Parp  | S. fur-72. 107 | NLU018225. 1, NLU027931. 1 | FBgn0010247                                                                                                         |
| PCNA  | S. fur-74. 129 | NLU007941. 1               | FBgn0005655                                                                                                         |
| smog  | S. fur-56. 66  | NLU022287. 1, NLU028367. 1 | FBgn0051660                                                                                                         |
| Ptip  | S. fur-49. 48  | NLU019373. 1               | FBgn0052133                                                                                                         |
| Pvr   | S. fur-27. 55  | NLU002246. 1, NLU004968. 1 | FBgn0032006                                                                                                         |
|       | S. fur-170. 3  |                            |                                                                                                                     |
| Rab11 | S. fur-13. 193 | NLU026714. 1               | FBgn0015790                                                                                                         |
| scrib | S. fur-347. 18 | NLU017397. 1               | FBgn0263289                                                                                                         |
| Spt6  | S. fur-98. 17  | NLU022796. 3               | FBgn0028982                                                                                                         |
| Tep1  | S. fur-70. 51  | NLU024076. 1               | FBgn0041183                                                                                                         |
| Tep2  |                |                            | FBgn0041182                                                                                                         |

|                       |              |                |                            |             |
|-----------------------|--------------|----------------|----------------------------|-------------|
|                       | Tep3         |                |                            | FBgn0041181 |
|                       | Tep4         |                |                            | FBgn0041180 |
|                       |              |                |                            |             |
|                       | Thor         | S. fur-207. 15 | NLU001242. 1, NLU015401. 1 | FBgn0261560 |
|                       | Tlk          | S. fur-682. 3  | /                          | FBgn0086899 |
|                       | Vps15        | S. fur-270. 24 | NLU026186. 1, NLU002513. 1 | FBgn0260935 |
|                       | vvl          | S. fur-250. 11 | NLU025618. 1               | FBgn0086680 |
|                       | zfh1         | S. fur-36. 98  | NLU017934. 2               | FBgn0004606 |
| antimicrobial peptide | Attacin-A    | /              | /                          | FBgn0012042 |
|                       | Attacin-B    | /              | /                          | FBgn0041581 |
|                       | Attacin-C    | /              | /                          | FBgn0041579 |
|                       | Attacin-D    | /              | /                          | FBgn0038530 |
|                       | Cecropin A1  | /              | /                          | FBgn0000276 |
|                       | Cecropin A2  | /              | /                          | FBgn0000277 |
|                       | Cecropin B   | /              | /                          | FBgn0000279 |
|                       | Cecropin C   | /              | /                          | FBgn0000278 |
|                       | Defensin     | S. fur-10. 120 | NLU011311. 1, NLU007940. 1 | FBgn0010385 |
|                       |              | S. fur-33. 51  |                            |             |
|                       | Diptericin A | /              | /                          | FBgn0004240 |
|                       | Diptericin B | /              | /                          | FBgn0034407 |
|                       | Drosocin     | /              | /                          | FBgn0010388 |
|                       | Drosomycin   | /              | /                          | FBgn0010381 |
| Drosomycin-like 1     | /            | /              | FBgn0052274                |             |

|                                 |                   |                                          |                            |             |
|---------------------------------|-------------------|------------------------------------------|----------------------------|-------------|
|                                 | Drosomycin-like 2 | /                                        | /                          | FBgn0052279 |
|                                 | Drosomycin-like 3 | /                                        | /                          | FBgn0052283 |
|                                 | Drosomycin-like 4 | /                                        | /                          | FBgn0052282 |
|                                 | Drosomycin-like 5 | /                                        | /                          | FBgn0035434 |
|                                 | Drosomycin-like 6 | /                                        | /                          | FBgn0052268 |
|                                 | Metchnikowin      | /                                        | /                          | FBgn0014865 |
|                                 | NOS               | S. fur-9. 52                             | NLU025650. 1               | FBgn0011676 |
| encapsulation of foreign target | alpha-Man-Ia      | S. fur-17. 159                           | NLU026219. 1               | FBgn0259170 |
|                                 | alpha-Man-Ib      | S. fur-241. 29                           | NLU014338. 1               | FBgn0039634 |
|                                 |                   | S. fur-489. 8                            |                            |             |
|                                 | alpha-Man-IIa     | S. fur-39. 3                             | NLU004974. 2               | FBgn0011740 |
|                                 | alpha-Man-IIb     | S. fur-129. 28                           | NLU011543. 1, NLU023574. 1 | FBgn0026616 |
|                                 |                   | /                                        |                            |             |
|                                 |                   | S. fur-825. 7                            |                            |             |
|                                 |                   | S. fur-70. 20                            |                            |             |
|                                 | Als2              | S. fur-494. 2                            | NLU012777. 1, NLU012778. 1 | FBgn0037116 |
|                                 | aPKC              | S. fur-116. 56                           | NLU007726. 1               | FBgn0261854 |
|                                 | Cdc42             | S. fur-171. 14                           | NLU025556. 1               | FBgn0010341 |
|                                 | Cdk5              | S. fur-50. 56                            | NLU014959. 1               | FBgn0013762 |
|                                 | Cdk5alpha         | S. fur-150. 22                           | NLU001312. 1, NLU005199. 1 | FBgn0027491 |
|                                 |                   | S. fur-150. 19                           |                            |             |
| DCTN1-p150                      | S. fur-85. 11     | NLU008672. 1                             | FBgn0001108                |             |
| DCX-EMAP                        | S. fur-518. 5     | NLU003351. 1                             | FBgn0259099                |             |
| Dhc64C                          | S. fur-63. 19     | NLU017272. 1, NLU017748. 1, NLU005440. 1 | FBgn0261797                |             |

|              |          |                 |                            |             |
|--------------|----------|-----------------|----------------------------|-------------|
|              | dia      | S. fur-20. 194  | NLU006524. 1               | FBgn0011202 |
|              | Eb1      | /               | NLU007853. 3               | FBgn0027066 |
|              | Eph      | S. fur-18. 207  | NLU018445. 1, NLU018446. 1 | FBgn0025936 |
|              | Ephrin   | S. fur-15. 173  | NLU007920. 1               | FBgn0040324 |
|              | Exn      | S. fur-877. 3   | NLU011083. 1               | FBgn0261547 |
|              | Flo2     | S. fur-229. 21  | NLU012648. 1               | FBgn0264078 |
|              | Itgbn    | /               | /                          | FBgn0010395 |
|              | LanA     | S. fur-359. 5   | /                          | FBgn0002526 |
|              | Mgat1    | /               | NLU007274. 1               | FBgn0034521 |
|              | OstDelta | S. fur-223. 18  | NLU015744. 1               | FBgn0034277 |
|              | Ostgamma | S. fur-324. 8   | NLU017277. 1               | FBgn0032015 |
|              | poly     | /               | /                          | FBgn0086371 |
|              | RhoBTB   | S. fur-33. 154  | NLU011755. 1               | FBgn0036980 |
|              | RhoGEF3  | S. fur-18. 90   | NLU007117. 1               | FBgn0264707 |
|              | RhoL     | /               | /                          | FBgn0014380 |
|              | Shc      | S. fur-11755. 1 | NLU026268. 1               | FBgn0015296 |
|              |          | S. fur-54. 85   |                            |             |
|              |          | S. fur-54. 99   |                            |             |
|              | Vav      | S. fur-23. 69   | NLU028815. 2               | FBgn0040068 |
|              | Zir      | S. fur-1433. 1  | NLU003059. 2, NLU010547. 1 | FBgn0031216 |
|              |          | S. fur-440. 5   |                            |             |
| phagocytosis | crq      | S. fur-51. 4    | NLU006788. 1               | FBgn0015924 |
|              |          | /               | /                          | /           |
|              |          | S. fur-13. 116  | NLU028772. 1               | /           |
|              |          | /               | /                          | FBgn0025697 |

|                         |                |                |                                          |             |
|-------------------------|----------------|----------------|------------------------------------------|-------------|
|                         | Rac1           | /              | /                                        | FBgn0010333 |
|                         | brm            | S. fur-108. 44 | NLU011826. 1, NLU022334. 1, NLU014082. 1 | FBgn0000212 |
|                         |                | S. fur-598. 8  |                                          |             |
|                         | EcR            | S. fur-50. 12  | NLU001978. 1                             | FBgn0000546 |
|                         | Jra            | /              | NLU005583. 1, NLU018476. 1               | FBgn0001291 |
|                         | pnt            | S. fur-57. 78  | NLU015813. 2                             | FBgn0003118 |
|                         | betaCOP        | S. fur-431. 10 | NLU010209. 1                             | FBgn0008635 |
|                         | Syx5           | /              | NLU017315. 1                             | FBgn0011708 |
|                         | gcm            | S. fur-28. 6   | /                                        | FBgn0014179 |
|                         |                | S. fur-84. 70  |                                          |             |
|                         | Trn            | S. fur-69. 5   | NLU011103. 1                             | FBgn0024921 |
|                         | DMAP1          | S. fur-85. 55  | NLU010679. 1                             | FBgn0034537 |
|                         | Nup98-96       | S. fur-16. 163 | NLU007944. 1                             | FBgn0039120 |
|                         |                | S. fur-1672. 1 |                                          |             |
|                         |                | S. fur-1251. 1 |                                          |             |
|                         | psidin         | /              | NLU012476. 2                             | FBgn0243511 |
|                         | kuz            | S. fur-192. 21 | NLU006855. 1                             | FBgn0259984 |
| mucosal immune response | bbg            | S. fur-38. 58  | NLU017024. 1                             | FBgn0087007 |
|                         | Duox           | S. fur-829. 6  | NLU016480. 1, NLU016482. 1               | FBgn0031464 |
|                         |                | S. fur-921. 1  |                                          |             |
|                         | Galphaq        | S. fur-72. 236 | NLU015017. 2                             | FBgn0004435 |
|                         | lic            | S. fur-14. 118 | NLU003122. 1                             | FBgn0261524 |
|                         | Mekk1          | S. fur-17. 172 | NLU002028. 1                             | FBgn0024329 |
|                         | Mkp3           | S. fur-67. 335 | NLU004064. 1                             | FBgn0036844 |
| norpA                   | S. fur-268. 14 | /              | /                                        |             |



|                                              |                |                |                                              |             |
|----------------------------------------------|----------------|----------------|----------------------------------------------|-------------|
|                                              |                | S. fur-68. 11  | /                                            | /           |
|                                              |                | S. fur-226. 20 | NLU020344. 3                                 | FBgn0004611 |
|                                              |                | /              | /                                            | FBgn0262738 |
|                                              |                | /              | /                                            | /           |
|                                              |                | /              | /                                            | /           |
|                                              |                | /              | NLU005122. 2, NLU019427. 2                   | /           |
|                                              | p38a           | S. fur-17. 307 | NLU014343. 1                                 | FBgn0015765 |
|                                              | p38b           |                |                                              | FBgn0024846 |
| negative<br>regulation of<br>immune response | Atg6           | S. fur-596. 2  | NLU024452. 1                                 | FBgn0264325 |
|                                              | dnr1           | S. fur-20. 247 | NLU011940. 1                                 | FBgn0260866 |
|                                              | Dsp1           | S. fur-246. 15 | NLU015101. 1, NLU021892. 1                   | FBgn0011764 |
|                                              |                | S. fur-246. 14 |                                              |             |
|                                              | faf            | S. fur-8. 174  | NLU006079. 2, NLU012546. 1, NLU<br>021571. 1 | FBgn0005632 |
|                                              | GlyP           | S. fur-487. 5  | NLU021959. 1                                 | FBgn0004507 |
|                                              | Gst02          | /              | NLU027429. 1                                 | FBgn0035906 |
|                                              | Lam            | S. fur-197. 34 | NLU027896. 1                                 | FBgn0002525 |
|                                              | MED6           | S. fur-295. 17 | NLU019881. 1                                 | FBgn0024330 |
|                                              |                | S. fur-951. 1  |                                              |             |
|                                              | Nxt1           | /              | /                                            | FBgn0028411 |
|                                              | Prx5           | S. fur-68. 55  | NLU020315. 1                                 | FBgn0038570 |
|                                              | Rala           | S. fur-727. 2  | /                                            | FBgn0015286 |
| RYBP                                         | S. fur-7. 142  | NLU003809. 1   | FBgn0034763                                  |             |
| sax                                          | S. fur-20. 106 | /              | FBgn0003317                                  |             |

|                                        |             |                |                            |                          |
|----------------------------------------|-------------|----------------|----------------------------|--------------------------|
|                                        | scny        | S. fur-84. 32  | NLU007457. 1               | FBgn0260936              |
|                                        | slif        | S. fur-230. 42 | NLU019298. 1, NLU020309. 1 | /                        |
|                                        |             | S. fur-50. 193 | NLU023326. 1               | FBgn0036493, FBgn0036764 |
|                                        |             | S. fur-345. 27 | NLU000066. 1, NLU020081. 1 | /                        |
|                                        |             | /              | /                          | FBgn0037203              |
|                                        |             | /              | /                          | /                        |
|                                        | SP2353      | S. fur-197. 44 | /                          | FBgn0034070              |
|                                        | tefu        | S. fur-158. 19 | NLU004916. 1, NLU028531. 1 | FBgn0045035              |
|                                        | Tim10       | S. fur-338. 15 | /                          | FBgn0027360              |
|                                        | unc-45      | S. fur-97. 14  | NLU005097. 1               | FBgn0010812              |
|                                        | Usp2        | S. fur-20. 70  | NLU013381. 1               | FBgn0031187              |
|                                        | <b>Nrf2</b> | S. fur-9. 282  | NLU002199. 1               | FBgn0262975              |
|                                        | wun         | S. fur-273. 10 | NLU004856. 2               | FBgn0016078              |
| positive regulation of immune response | akirin      | /              | /                          | FBgn0082598              |
|                                        | att-ORFA    | S. fur-622. 8  | NLU019757. 1               | FBgn0067783              |
|                                        | CG13994     | /              | /                          | FBgn0031772              |
|                                        | CG17680     | /              | /                          | FBgn0062440              |
|                                        | CG2051      | S. fur-16. 19  | NLU023404. 1               | FBgn0037376              |
|                                        | CG32795     | S. fur-32. 48  | NLU021502. 1               | FBgn0040384              |
|                                        | CG9925      | /              | /                          | FBgn0038191              |
|                                        | chico       | S. fur-77. 62  | NLU003485. 1, NLU024952. 1 | FBgn0024248              |
|                                        | Crag        | S. fur-89. 92  | NLU026389. 1               | FBgn0025864              |
|                                        | Etl1        | S. fur-181. 1  | NLU020728. 1               | FBgn0032157              |
|                                        | HBS1        | S. fur-134. 8  | NLU014461. 1               | FBgn0042712              |

|                 |              |                |                                          |                          |
|-----------------|--------------|----------------|------------------------------------------|--------------------------|
|                 | Hr78         | S. fur-162. 14 | NLU015534. 1                             | FBgn0015239              |
|                 | ht1          | S. fur-27. 19  | /                                        | FBgn0005592, FBgn0010389 |
|                 | Ide          | S. fur-36. 56  | NLU013696. 3                             | FBgn0001247              |
|                 | kug          | S. fur-369. 15 | NLU005127. 1, NLU018506. 1, NLU018507. 1 | FBgn0001075              |
|                 |              | S. fur-316. 19 | NLU008341. 1                             | /                        |
|                 |              | S. fur-6. 221  | NLU010443. 1, NLU016499. 1               | /                        |
|                 |              | S. fur-316. 13 | NLU015764. 1,                            | FBgn0000497              |
|                 |              | S. fur-6. 194  | NLU007013. 1                             | /                        |
|                 |              | /              | /                                        | FBgn0261574              |
|                 | LanB1        | S. fur-24. 172 | NLU025937. 2                             | FBgn0261800              |
|                 | Mmp2         | S. fur-259. 18 | NLU025213. 1                             | FBgn0033438              |
|                 | mtd          | S. fur-8. 143  | NLU003015. 1, NLU003011. 1, NLU003010. 1 | FBgn0013576              |
|                 | Nsun5        | /              | /                                        | FBgn0259704              |
|                 | PDCD-5       | S. fur-169. 12 | NLU008889. 1                             | FBgn0036580              |
|                 | Pplalpha-96A | /              | NLU011463. 1                             | FBgn0003134              |
|                 | puc          | S. fur-167. 52 | NLU023509. 1, NLU016695. 1               | FBgn0243512              |
|                 | RluA-2       | /              | NLU002857. 1                             | FBgn0032256              |
|                 | Sec31        | S. fur-11. 25  | NLU003794. 1, NLU003795. 1               | FBgn0033339              |
| immune response | Atf3         | S. fur-125. 49 | NLU020429. 1                             | FBgn0028550              |
|                 | cher         | S. fur-7. 140  | NLU003806. 1                             | FBgn0014141              |
|                 | CSN5         | S. fur-44. 49  | NLU027652. 1                             | FBgn0027053              |
|                 | Deaf1        | S. fur-438. 6  | NLU009895. 1                             | FBgn0013799              |

|                 |                 |                |                            |                          |
|-----------------|-----------------|----------------|----------------------------|--------------------------|
|                 | Dlip3           | /              | /                          | FBgn0040465              |
|                 | eya             | S. fur-20. 138 | NLU019650. 1               | FBgn0000320              |
|                 | modSP           | S. fur-102. 37 | NLU026230. 2               | FBgn0051217              |
|                 |                 | S. fur-79. 44  |                            |                          |
|                 | POSH            | /              | NLU011904. 2, NLU024807. 1 | FBgn0040294              |
|                 | Reeler          | S. fur-159. 27 | NLU024648. 1               | FBgn0039648, FBgn0261534 |
|                 | Uba2            | S. fur-594. 3  | NLU006181. 1               | FBgn0029113              |
|                 |                 | S. fur-691. 11 |                            |                          |
|                 | Vps16B          | S. fur-97. 22  | NLU025446. 3               | FBgn0039702              |
|                 | Vps33B          | S. fur-107. 10 | /                          | FBgn0039335              |
| Caspase         | Caspase         | S. fur-17. 341 | NLU005472. 1               | FBgn0028381              |
|                 | Caspase         | S. fur-6. 178  | NLU005810. 1               | FBgn0026404              |
|                 | Caspase         | S. fur-1194. 2 | NLU006137. 1               | FBgn0036967              |
|                 | Caspase         | S. fur-23. 136 | NLU002884. 1               | FBgn0010501              |
|                 | Caspase         | S. fur-739. 1  | /                          | FBgn0019972              |
|                 | Caspase         | S. fur-460. 16 | /                          | FBgn0036449              |
|                 | Caspase         | S. fur-24. 353 | /                          | FBgn0028406              |
|                 | Caspase         | /              | /                          | FBgn0033051              |
|                 | Caspase         | /              | /                          | FBgn0033659              |
|                 | Caspase         | /              | /                          | FBgn0033661              |
|                 | Caspase         | /              | /                          | FBgn0020381              |
| Catalase        | Catalase        | /              | /                          | FBgn0038465              |
|                 | Catalase        | S. fur-314. 12 | NLU001797. 1               | FBgn0000261              |
| Fibrinogen-like | Fibrinogen-like | /              | /                          | FBgn003016               |

|                                |                                |                |              |                                           |
|--------------------------------|--------------------------------|----------------|--------------|-------------------------------------------|
| Proteins                       | Proteins                       |                |              | FBgn0030164                               |
|                                | Fibrinogen-like Proteins       | /              |              | FBgn0031804<br>FBgn0050281                |
|                                | Fibrinogen-like Proteins       | /              | /            | FBgn0033312<br>FBgn0034160<br>FBgn0050280 |
|                                | Fibrinogen-like Proteins       | S. fur-418. 10 | NLU010459. 1 |                                           |
|                                | Fibrinogen-like Proteins       | S. fur-72. 247 | NLU023744. 1 |                                           |
|                                | Fibrinogen-like Proteins       | /              | /            |                                           |
|                                | Fibrinogen-like Proteins       | /              | /            |                                           |
|                                | Fibrinogen-like Proteins       | /              | /            | FBgn0087011                               |
|                                | Fibrinogen-like Proteins       | /              | /            | FBgn0038365                               |
|                                | Fibrinogen-like Proteins       | /              | /            | FBgn0003326                               |
| IAP Repeat                     | IAP Repeat                     | /              | /            | FBgn0037808                               |
|                                | IAP Repeat                     | S. fur-234. 14 | NLU004965. 1 | FBgn0260635                               |
|                                | IAP Repeat                     | S. fur-119. 29 | NLU001578. 1 | FBgn0015247                               |
|                                | IAP Repeat                     | /              | /            | FBgn0264291                               |
| MD-2-related lipid recognition | MD-2-related lipid recognition | /              | /            | FBgn0031381                               |
|                                | MD-3-related                   | /              | /            | FBgn0039801                               |

|                     |                                 |                |              |             |
|---------------------|---------------------------------|----------------|--------------|-------------|
|                     | lipid recognition               |                |              |             |
|                     | MD-4-related lipid recognition  | /              | /            | FBgn0051410 |
|                     | MD-5-related lipid recognition  | /              | /            | FBgn0037783 |
|                     | MD-6-related lipid recognition  | /              | /            | FBgn0037782 |
|                     | MD-7-related lipid recognition  | /              | /            | FBgn0038198 |
|                     | MD-8-related lipid recognition  | S. fur-283. 24 | /            | FBgn0039154 |
|                     | MD-9-related lipid recognition  | /              | /            | FBgn0039800 |
|                     | MD-10-related lipid recognition | /              | /            | FBgn0039801 |
|                     | MD-11-related lipid recognition | /              | /            | FBgn0039801 |
| Scavenger Receptors | Scavenger Receptors             | /              | /            | FBgn0015924 |
|                     | Scavenger Receptors             | /              | /            | FBgn0025697 |
|                     | Scavenger Receptors             | S. fur-28. 74  | NLU001450. 2 | FBgn0010435 |
|                     | Scavenger Receptors             | S. fur-65. 66  | NLU016424. 2 | FBgn0014033 |
|                     | Scavenger                       | S. fur-101. 93 | NLU015195. 1 | FBgn0020377 |

|         |                     |                |              |             |
|---------|---------------------|----------------|--------------|-------------|
|         | Receptors           |                |              |             |
|         | Scavenger Receptors | S. fur-84. 65  | NLU029081. 1 | FBgn0031547 |
|         | Scavenger Receptors | S. fur-38. 96  | NLU017261. 1 | FBgn0020376 |
|         | Scavenger Receptors | S. fur-982. 3  | NLU011924. 1 | FBgn0034660 |
|         | Scavenger Receptors | S. fur-113. 6  | NLU028762. 1 | FBgn0027562 |
|         | Scavenger Receptors | S. fur-74. 3   | NLU005452. 1 | FBgn0023479 |
|         | Scavenger Receptors | S. fur-168. 24 | NLU009452. 1 | FBgn0031571 |
|         | Scavenger Receptors | S. fur-17. 355 | NLU020729. 3 | FBgn0260004 |
|         | Scavenger Receptors | S. fur-15. 137 | NLU009453. 1 | FBgn0033192 |
|         | Scavenger Receptors | S. fur-1. 36   | NLU016193. 1 | FBgn0035091 |
|         | Scavenger Receptors | S. fur-15. 133 | NLU011927. 1 | FBgn0058006 |
|         | Scavenger Receptors | /              | /            | FBgn0035815 |
|         | Scavenger Receptors | /              | /            | FBgn0035090 |
| Spatzle | Spatzle             | S. fur-54. 115 | NLU023813. 1 | FBgn0003495 |

|                                  |                                  |                |              |             |
|----------------------------------|----------------------------------|----------------|--------------|-------------|
|                                  | Spatzle                          | S. fur-5. 212  | NLU021599. 1 | FBgn0035056 |
|                                  | Spatzle                          | S. fur-24. 293 | NLU021391. 1 | FBgn0031959 |
|                                  | Spatzle                          | S. fur-166. 29 | NLU021217. 1 | FBgn0035379 |
|                                  | Spatzle                          | S. fur-261. 1  | NLU009098. 1 | FBgn0052343 |
|                                  | Spatzle                          | S. fur-72. 508 | NLU004373. 1 | FBgn0032362 |
|                                  | Spatzle                          | S. fur-33. 150 | NLU006163. 1 | FBgn0085438 |
|                                  | Spatzle                          | /              | NLU019692. 1 | FBgn0039102 |
|                                  | Spatzle                          | /              | NLU021596. 1 | /           |
| Superoxide<br>dismutase          | Superoxide<br>dismutase          | S. fur-13. 25  | /            | /           |
|                                  | Superoxide<br>dismutase          | S. fur-41. 88  | /            | FBgn0034962 |
|                                  | Superoxide<br>dismutase          | S. fur-8. 79   | /            | FBgn0039386 |
|                                  | Superoxide<br>dismutase          | S. fur-23. 71  | NLU015321. 2 | FBgn0003462 |
|                                  | Superoxide<br>dismutase          | S. fur-33. 90  | NLU000900. 1 | FBgn0010213 |
|                                  | Superoxide<br>dismutase          | S. fur-67. 126 | NLU014615. 1 | FBgn0033631 |
|                                  | Superoxide<br>dismutase          | S. fur-67. 143 | NLU011195. 1 | FBgn0052850 |
| Thioester-contain<br>ing protein | Thioester-contain<br>ing protein | S. fur-70. 51  | NLU024076. 1 | FBgn0041180 |
|                                  | Thioester-contain<br>ing protein | /              | NLU015403. 1 | FBgn0041182 |



|            |                              |                |              |             |
|------------|------------------------------|----------------|--------------|-------------|
|            | Thioester-containing protein | /              | /            | FBgn0041181 |
|            | Thioester-containing protein | /              | /            | FBgn0041183 |
|            | Thioester-containing protein | /              | /            | FBgn0039854 |
|            | Thioester-containing protein | /              | /            | FBgn0039855 |
| peroxidase | peroxidase                   | S. fur-219. 18 | NLU019777. 1 | FBgn0038511 |
|            | peroxidase                   | S. fur-126. 46 | NLU001846. 1 | FBgn0010053 |
|            | peroxidase                   | S. fur-46. 51  | NLU003657. 1 | FBgn0035438 |
|            | peroxidase                   | S. fur-77. 96  | NLU020527. 1 | FBgn0031464 |
|            | peroxidase                   | S. fur-18. 30  | NLU024356. 2 | FBgn0032685 |
|            | peroxidase                   | S. fur-120. 36 | NLU021034. 1 | FBgn0040309 |
|            | peroxidase                   | S. fur-273. 7  | NLU011776. 1 | FBgn0038519 |
|            | peroxidase                   | S. fur-47. 125 | NLU015971. 1 | FBgn0040305 |
|            | peroxidase                   | S. fur-30. 107 | NLU026271. 1 | FBgn0037102 |
|            | peroxidase                   | S. fur-15. 277 | NLU025371. 1 | FBgn0040308 |
|            | peroxidase                   | S. fur-65. 41  | NLU026550. 1 | FBgn0259233 |
|            | peroxidase                   | S. fur-17. 242 | NLU003276. 1 | FBgn0033520 |
|            | peroxidase                   | S. fur-430. 8  | NLU021340. 1 | FBgn0033521 |
|            | peroxidase                   | S. fur-6. 74   | NLU004434. 1 | FBgn0033518 |
|            | peroxidase                   | S. fur-22. 68  | NLU016990. 1 | FBgn0031479 |
|            | peroxidase                   | S. fur-128. 19 | NLU006818. 1 | FBgn0038465 |
| peroxidase | S. fur-22. 79                | NLU019027. 2   | FBgn0011828  |             |

**Table S3. Summary of the 11 RNA-seq libraries used in this study**

| Sample  |    | Clean Reads | Clean Base (G) | Total Genome Map reads | Total Genome Map Rate (%) | Uniq Genome Map Reads | Uniq Genome Map Rate (%) | SRBSDV Map Rate (%) | Total mapping (%) |
|---------|----|-------------|----------------|------------------------|---------------------------|-----------------------|--------------------------|---------------------|-------------------|
| HVT     | C1 | 22,037,322  | 6.04           | 4,828,667              | 21.91%                    | 3,050,280             | 13.84%                   | 38.31%              | 60.22%            |
|         | C2 | 24,570,532  | 6.68           | 5,831,096              | 23.73%                    | 3,226,271             | 13.13%                   | 26.70%              | 50.43%            |
| MVT     | A1 | 32,580,835  | 8.96           | 7,366,039              | 22.61%                    | 4,124,258             | 12.66%                   | 25.35%              | 47.96%            |
|         | A2 | 27,972,323  | 7.70           | 6,443,219              | 23.03%                    | 3,327,296             | 11.89%                   | 23.30%              | 46.33%            |
|         | A3 | 28,857,802  | 7.91           | 7,651,278              | 26.51%                    | 4,250,958             | 14.73%                   | 15.53%              | 42.04%            |
| NVF     | B1 | 32,940,740  | 8.92           | 20,507,542             | 62.26%                    | 10,686,618            | 32.44%                   | 0.12%               | 62.38%            |
|         | B2 | 29,828,260  | 8.00           | 17,682,796             | 59.28%                    | 9,013,809             | 30.22%                   | 0.13%               | 59.41%            |
|         | B3 | 33,855,507  | 9.25           | 15,111,096             | 44.63%                    | 9,008,779             | 26.61%                   | 0.16%               | 44.79%            |
| Healthy | O1 | 19,263,210  | 5.30           | 11,875,751             | 61.65%                    | 8,717,036             | 45.25%                   | 0.09%               | 61.74%            |
|         | O2 | 19,934,219  | 5.49           | 12,153,259             | 60.97%                    | 8,134,962             | 40.81%                   | 0.09%               | 61.06%            |
|         | O3 | 20,968,250  | 5.76           | 12,795,336             | 61.02%                    | 9,040,440             | 43.11%                   | 0.07%               | 61.09%            |

**Table S4. The down- regulated and up-regulated immune-related genes in NVF, MVT and HVT**

| Down/Up-regulated | Gene ID      | Gene name                              | NFV | MVT | HVT |
|-------------------|--------------|----------------------------------------|-----|-----|-----|
|                   | Sfur-10.120  | Defensin                               | Yes | No  | Yes |
|                   | Sfur-107.10  | immune response                        | Yes | Yes | Yes |
|                   | Sfur-166.29  | Spatzle                                | No  | Yes | Yes |
|                   | Sfur-18.207  | encapsulation of foreign target        | No  | Yes | No  |
|                   | Sfur-184.28  | IMD signaling pathway                  | No  | Yes | No  |
|                   | Sfur-197.44  | negative regulation of immune response | No  | Yes | Yes |
|                   | Sfur-219.18  | Peroxidase                             | Yes | Yes | Yes |
|                   | Sfur-22.68   | Peroxidase                             | Yes | Yes | Yes |
|                   | Sfur-22.79   | Peroxidase                             | Yes | Yes | Yes |
| Down-regulated    |              | negative regulation of immune response |     |     |     |
|                   | Sfur-295.17  | response                               | Yes | No  | No  |
|                   | Sfur-430.8   | Peroxidase                             | No  | Yes | No  |
|                   | Sfur-49.2    | CLIP-domain serine protease            | No  | Yes | No  |
|                   | Sfur-54.75   | CLIP-domain serine protease            | Yes | No  | No  |
|                   | Sfur-602.5   | Atg7                                   | No  | No  | Yes |
|                   | Sfur-65.41   | Peroxidase                             | No  | Yes | No  |
|                   | Sfur-67.126  | Superoxide dismutase                   | Yes | Yes | Yes |
|                   | Sfur-74.3    | Scavenger Receptors                    | Yes | Yes | Yes |
|                   | Sfur-829.6   | mucosal immune response                | Yes | Yes | Yes |
|                   | Sfur-925.2   | C-lectin                               | No  | Yes | No  |
| Up-regulated      | Sfur-11755.1 | encapsulation of foreign target        | No  | Yes | Yes |

---

|             |                                 |     |     |     |
|-------------|---------------------------------|-----|-----|-----|
| Sfur-126.46 | Peroxidase                      | Yes | No  | No  |
| Sfur-24.293 | Spatzle                         | Yes | No  | No  |
| Sfur-2570.1 | Serpin                          | Yes | Yes | Yes |
| Sfur-335.4  | Serpin                          | No  | Yes | No  |
| Sfur-377.2  | Serpin                          | No  | No  | Yes |
| Sfur-418.10 | Fibrinogen-like Proteins        | Yes | No  | No  |
| Sfur-54.85  | encapsulation of foreign target | Yes | Yes | Yes |

---
